# Supplementary material for: Development of A Tool for Assessing the Reputation of Zoos: The Zoo Ethical Reputation Survey (ZERS)
Source: MDPI journal article supplement (doi:10.3390/ani12202802), 2022-10-17

## Supplementary File S2

### DESCRIPTIVES AND SURVEY PLOTS

#### PERFORMANCE

17\_PERF1

*Zoos are committed to guaranteeing high standards of animal welfare*

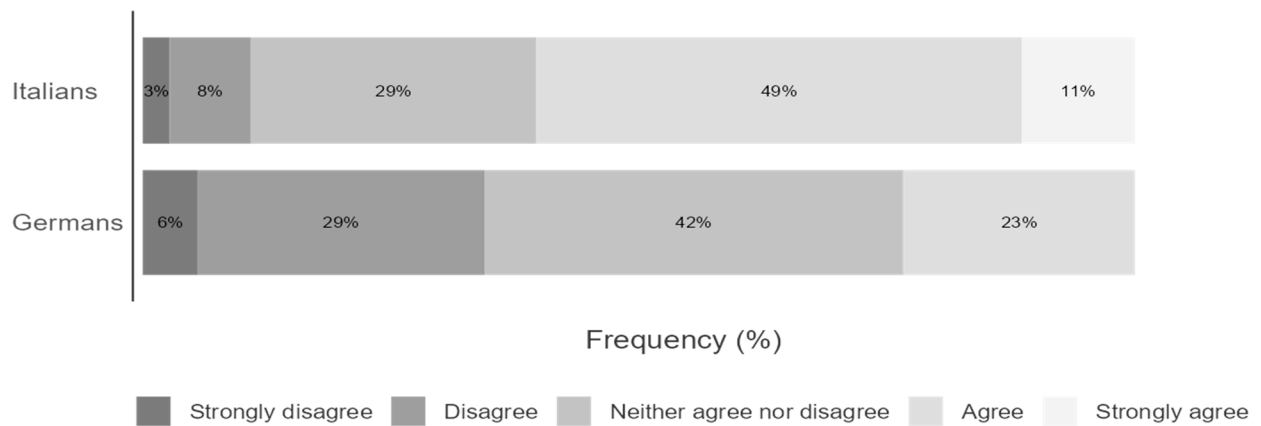

18\_PERF2

*Zoos educate their visitors about wildlife conservation*

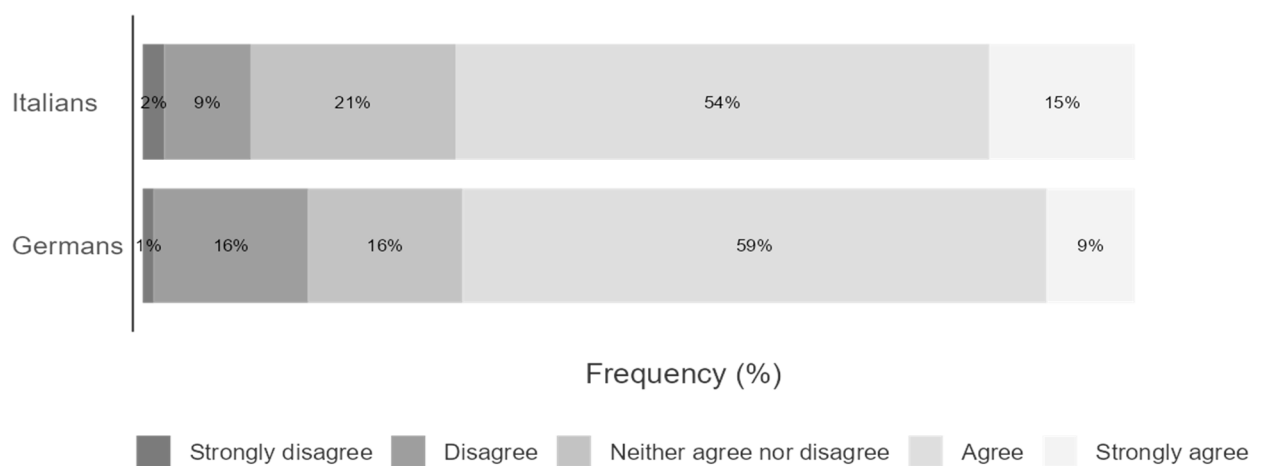

## 19\_PERF3

*Zoos do scientific research*

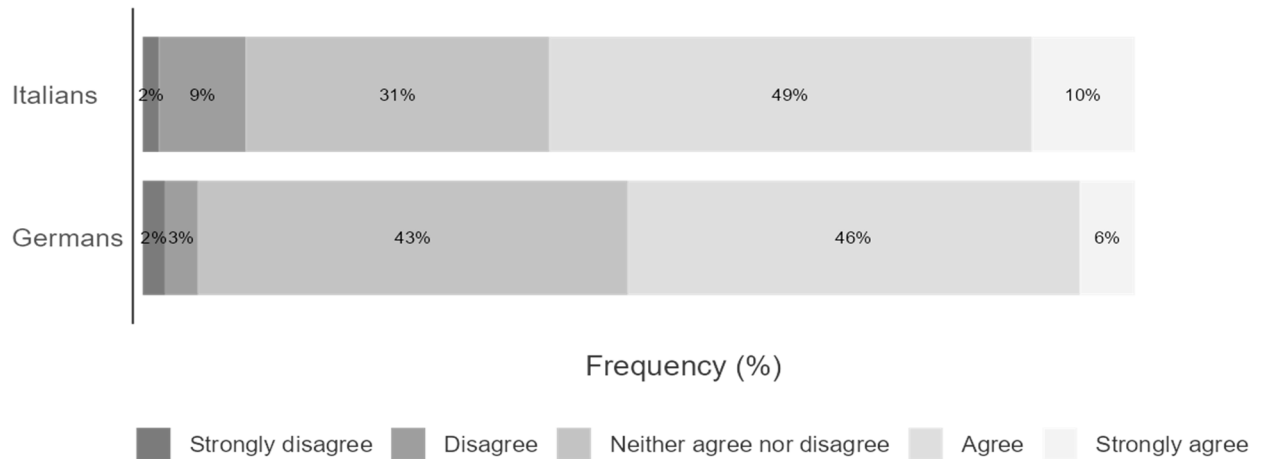

## 21\_PERF4

*Zoos dedicate themselves to conservation projects in the wild*

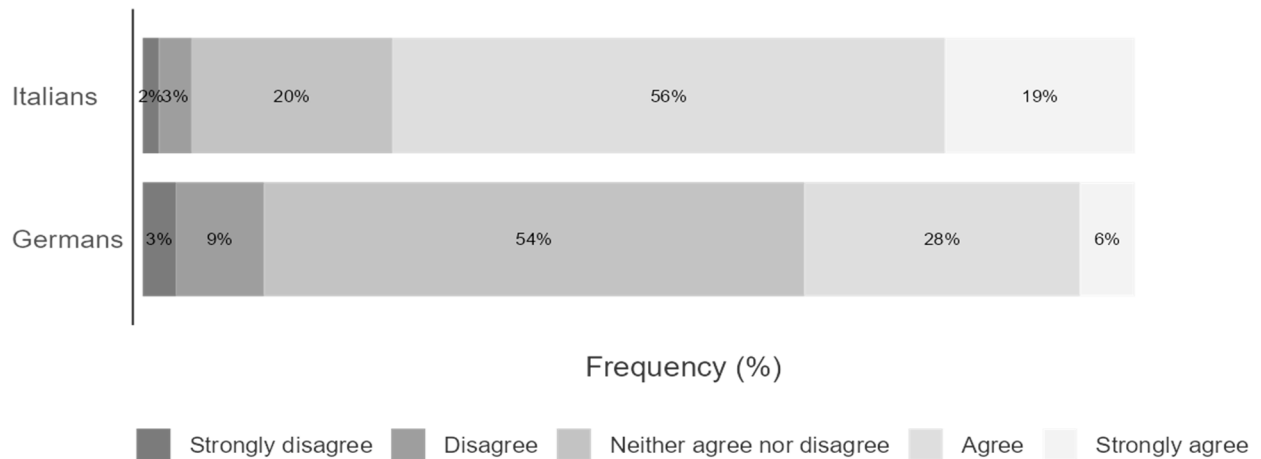

## 31\_PERF5

*Zoos are going to become a bigger reality in the future*

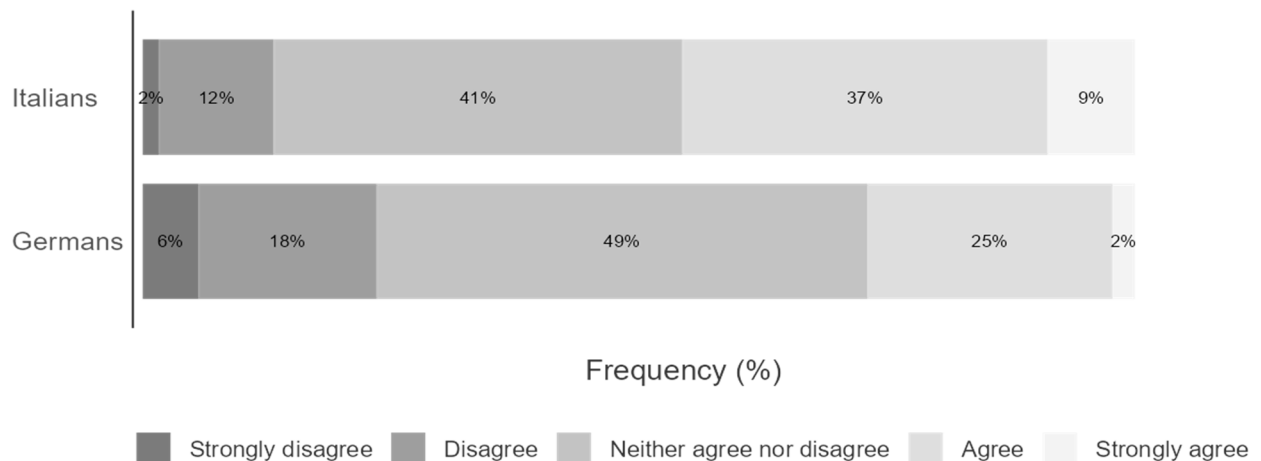

## PRODUCT AND SERVICE

20\_PR\_SR1

*The time spent in zoos is a good value for the money spent for the ticket.*

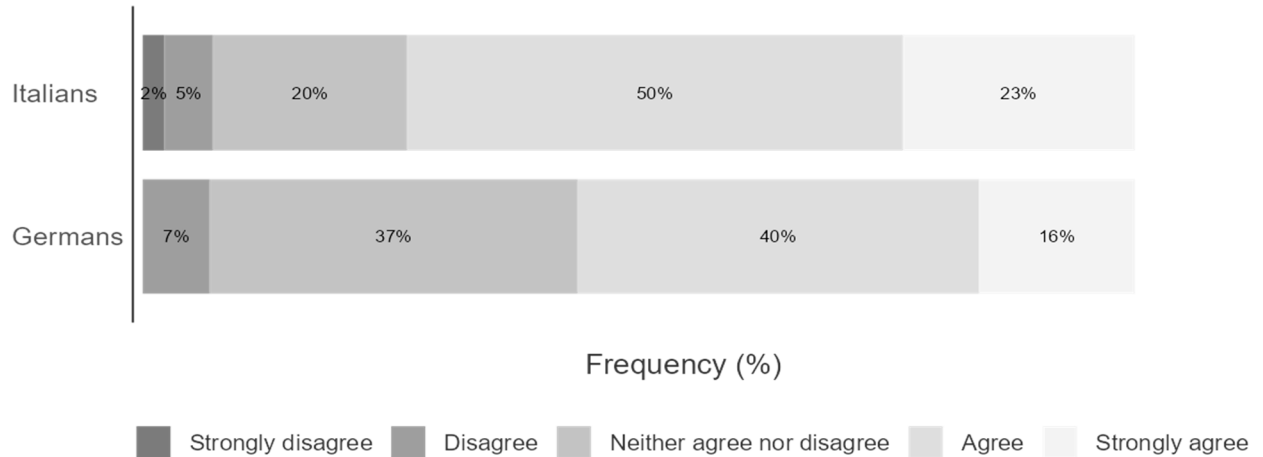

27\_PR\_SR2

*Zoos' staff help me in having a nice day at the zoo.*

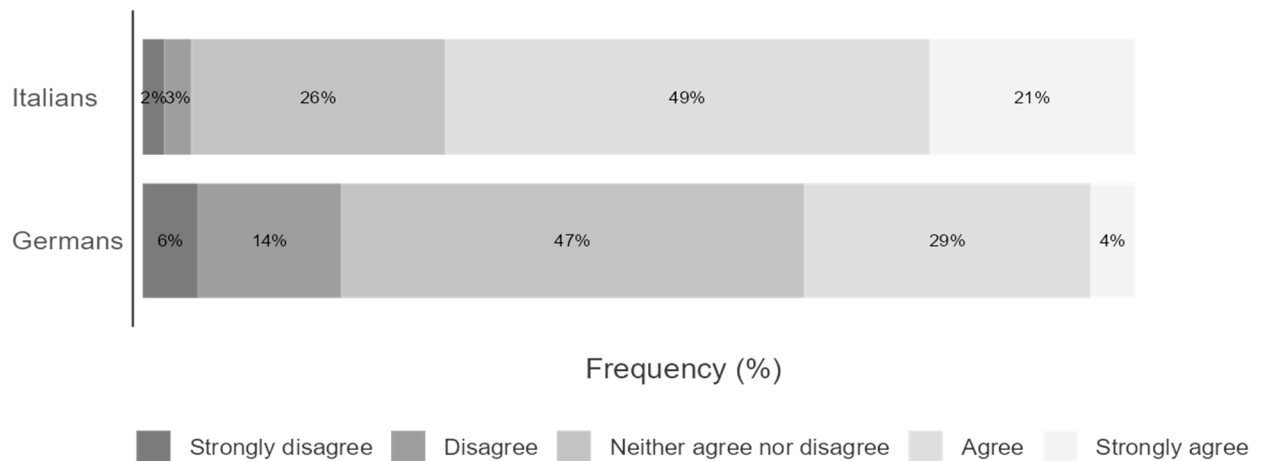

## WORKPLACE

### 24\_WORKP1

*Zoos' staff is passionate to their job.*

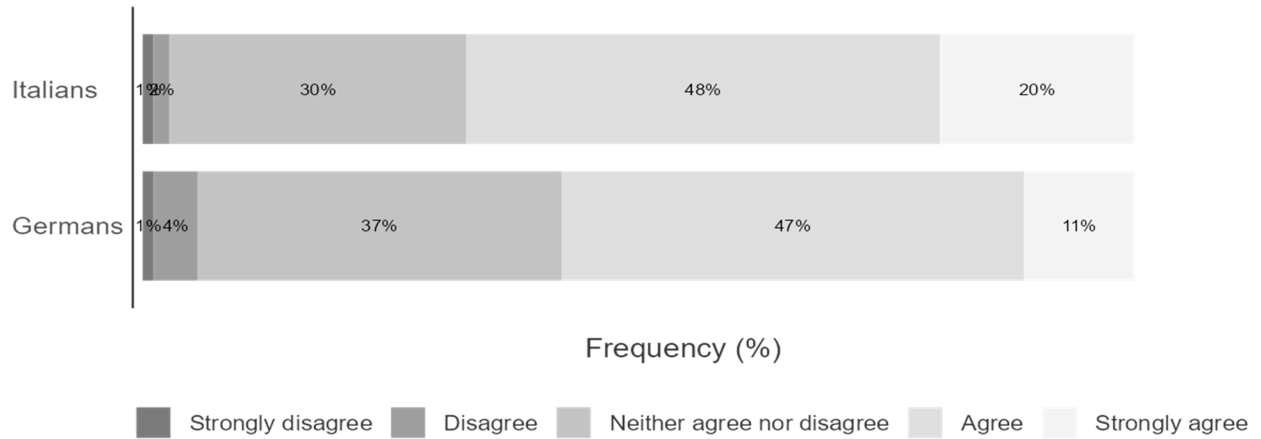

### 25\_WORKP2

*Zoos are well managed.*

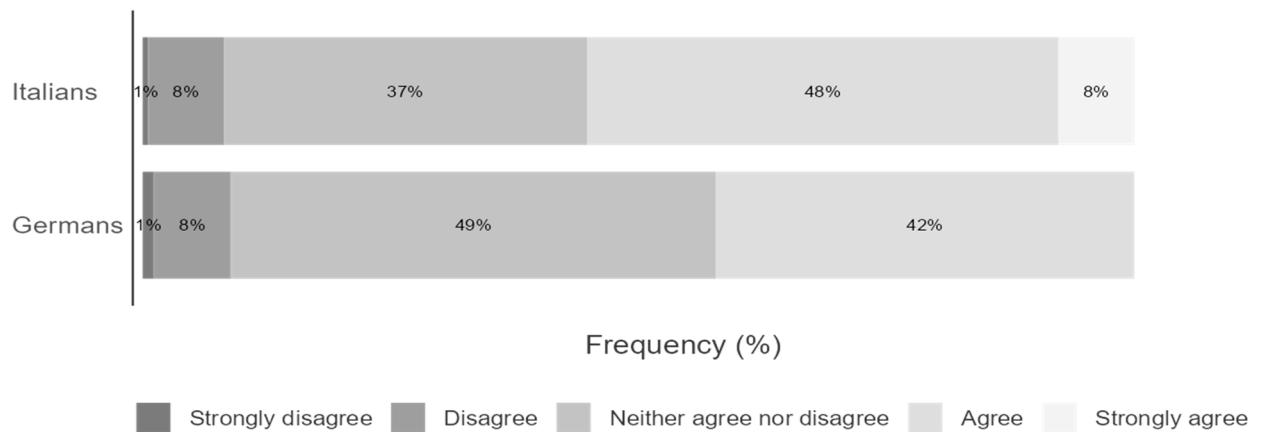

### 26\_WORKP3

*Zoos are good companies to work for.*

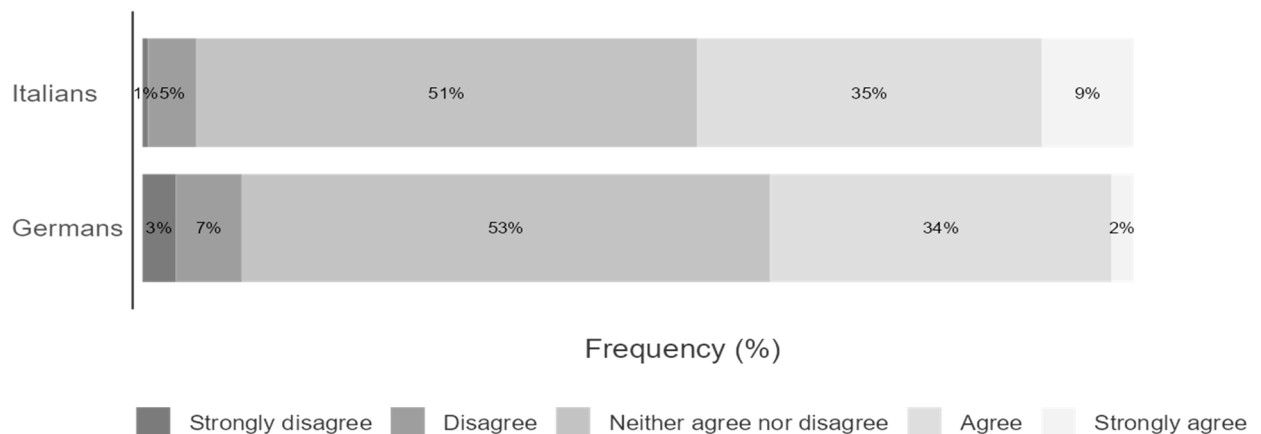

## SOCIAL RESPONSIBILITY

28\_SOCRES1

*Zoos promote projects with local communities.*

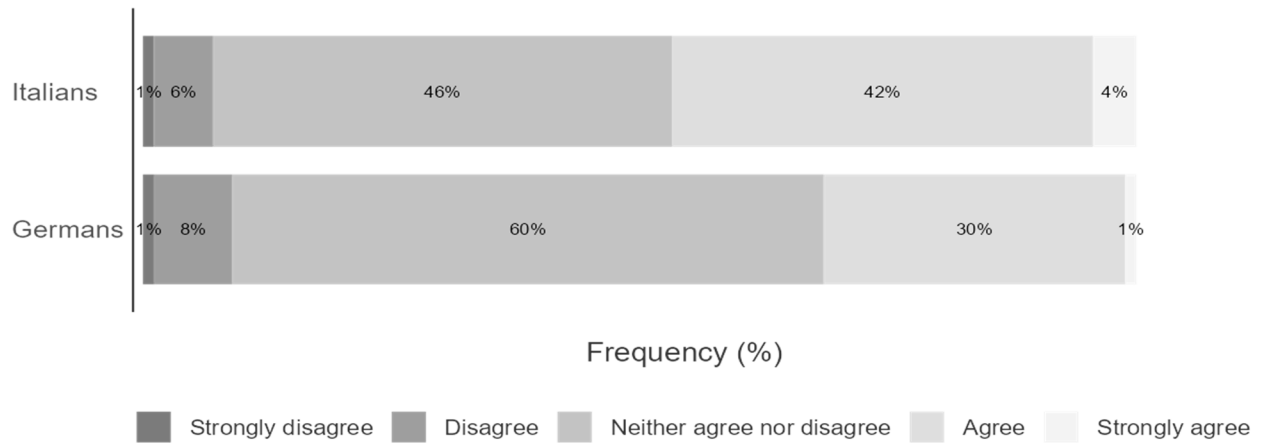

29\_SOCRES2

*Zoos are environmentally responsible organizations.*

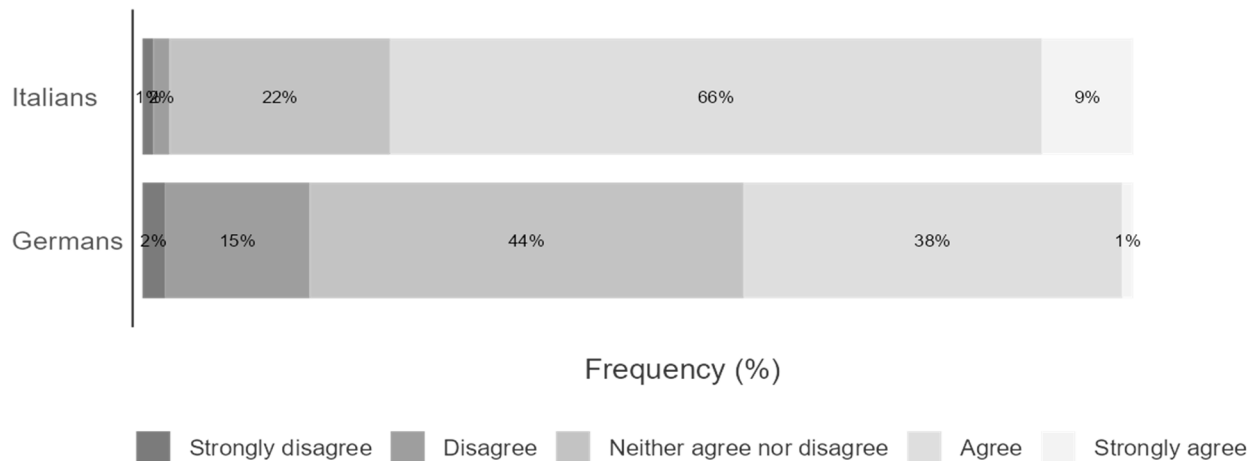

30\_SOCRES3

*Zoos support good causes.*

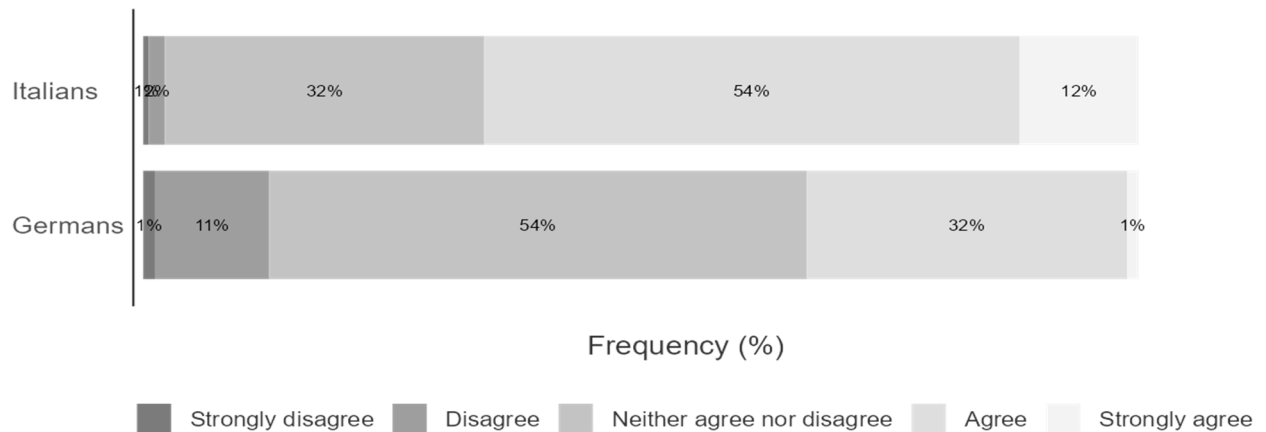

## VISION

### 34\_VISION1R

*Zoos make unclear and undefined promises.*

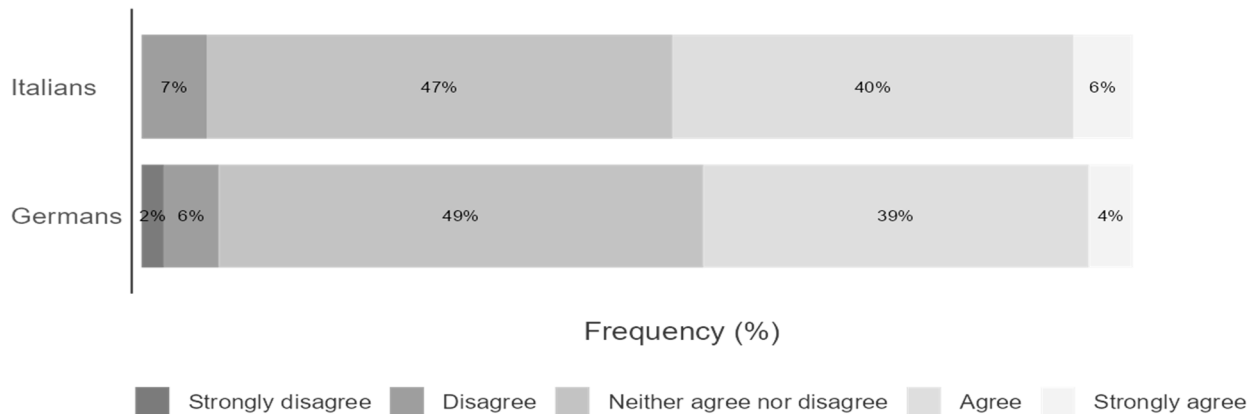

### 35\_VISION2

*Zoos have excellent management.*

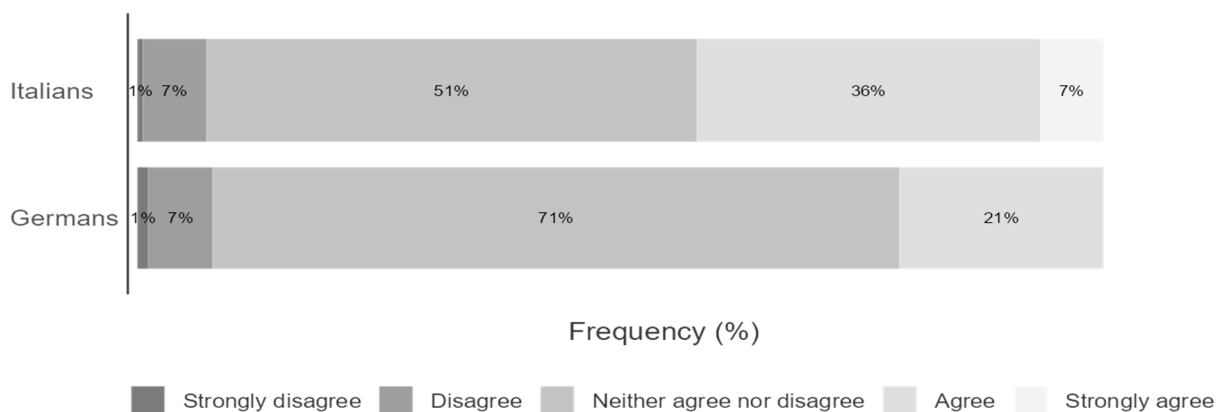

### 36\_VISION3

*Zoos explain clearly their goals and their mission.*

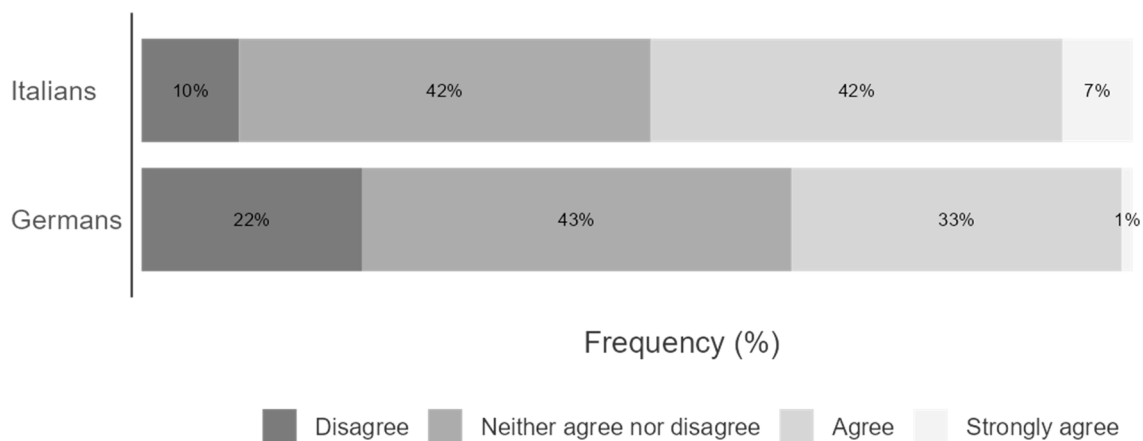

# ETHICAL RESPONSIBILITY

23\_ETR1

*Zoos act in a transparent and ethical way.*

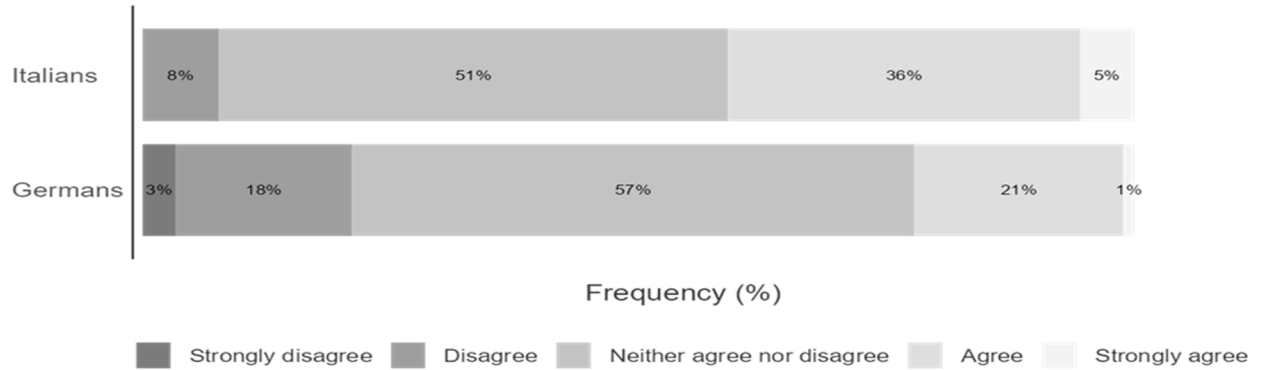

33\_ETR2

*Zoos are open and transparent about the way they operate.*

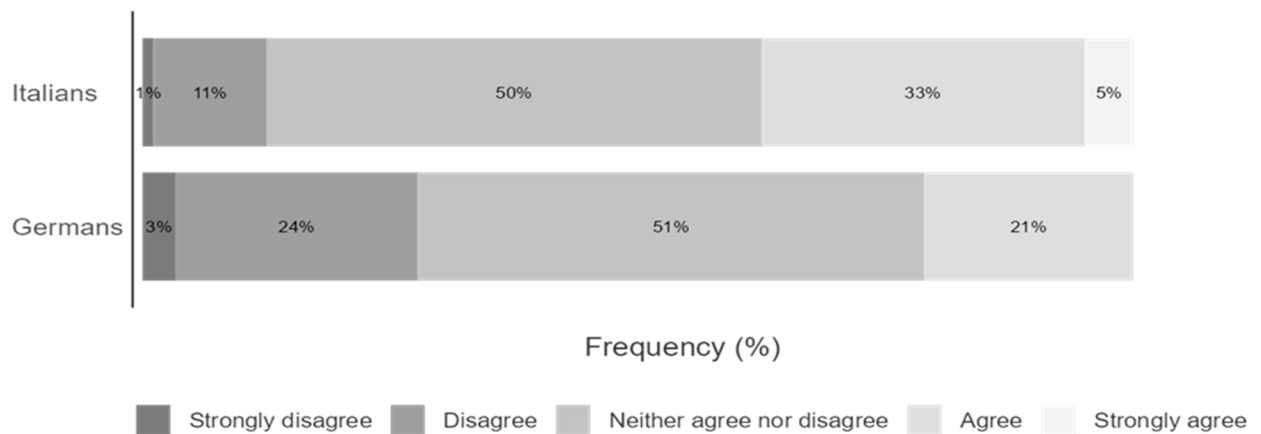

37\_ETR3

*Zoos are accurate when disseminating information.*

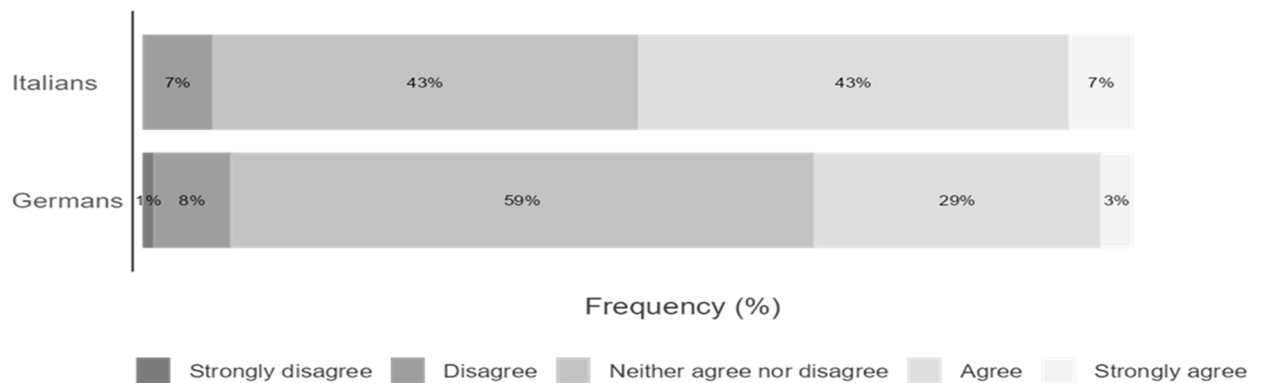

38\_ETR4

*Zoos do what they say they are going to do.*

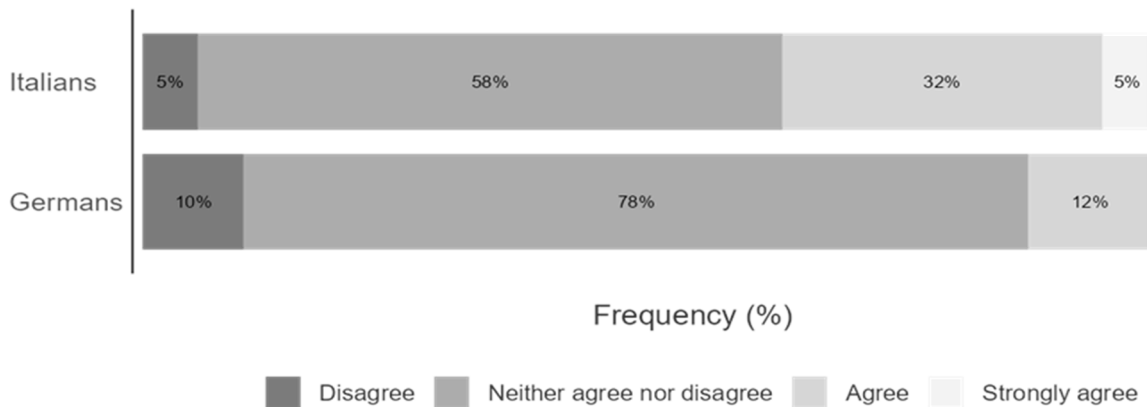

39\_ETR5R

*Zoos are dishonest and false in their communications.*

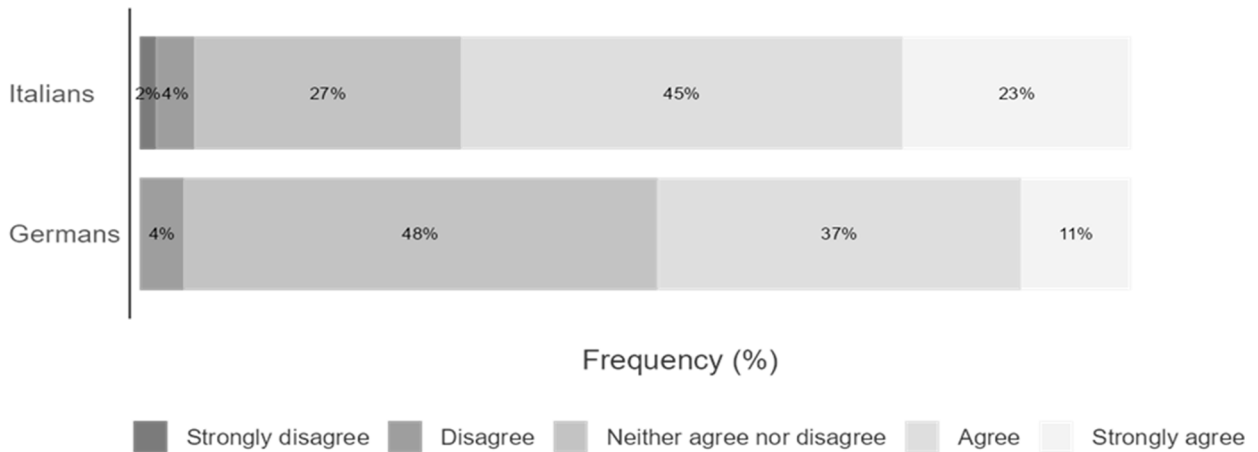

32\_ETR6

*Zoos handle their animals in a responsible way*

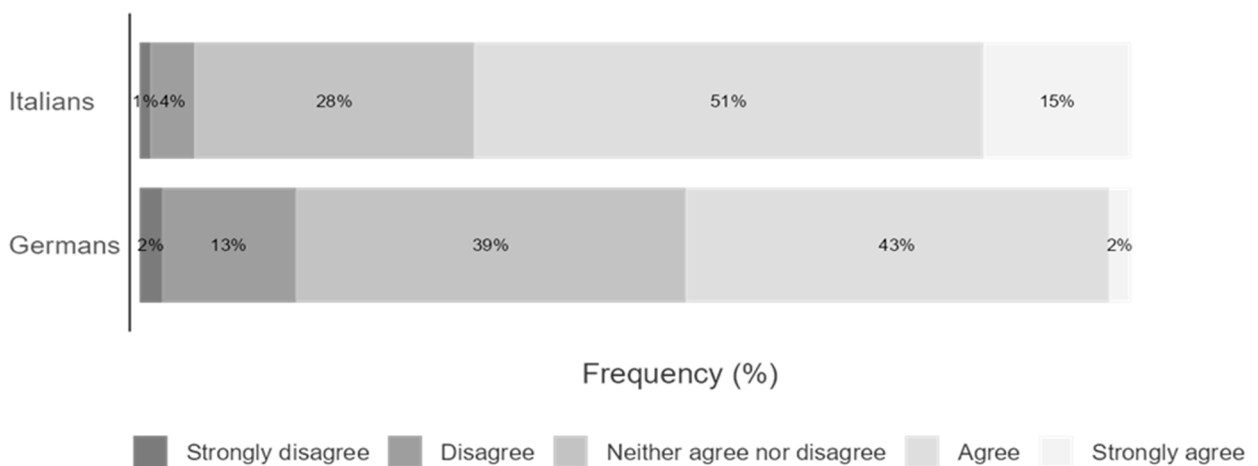

## POSITIVE WORD OF MOUTH

50\_PWM1

*I will suggest to a friend to go to zoos.*

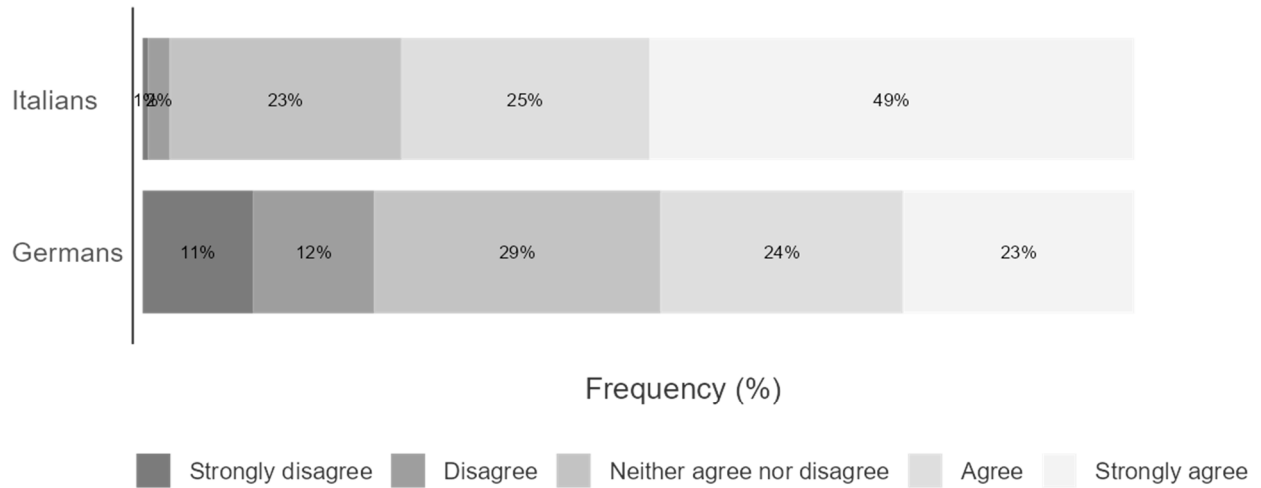

51\_PWM2

*I will say positive things about zoos.*

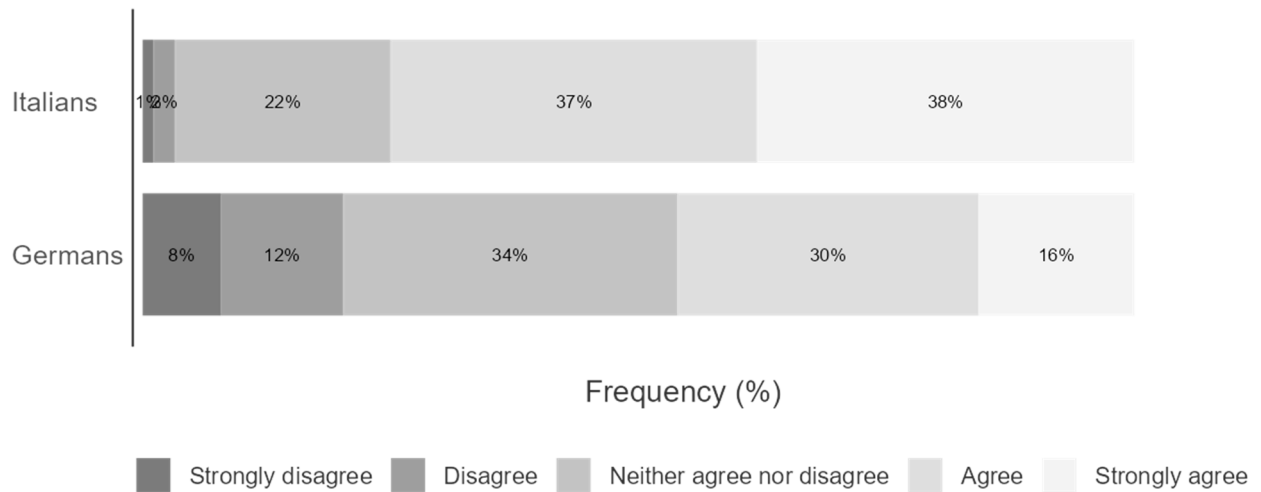

## LOYALTY

7\_LOY1

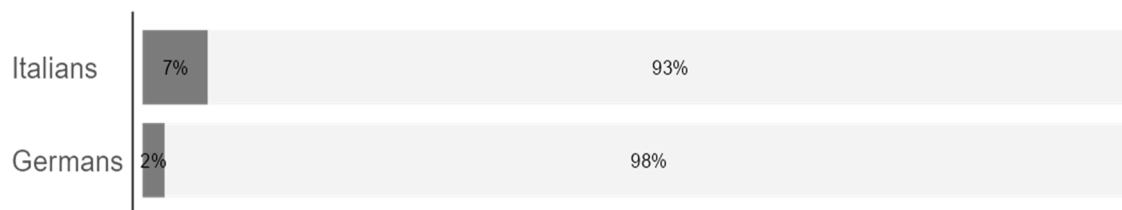

Frequency (%)

Yes No

52\_LOY2

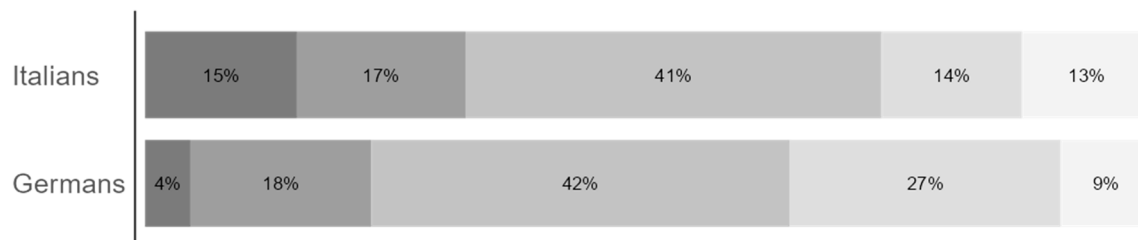

Frequency (%)

Strongly disagree Disagree Neither agree nor disagree Agree Strongly agree

53\_LOY3

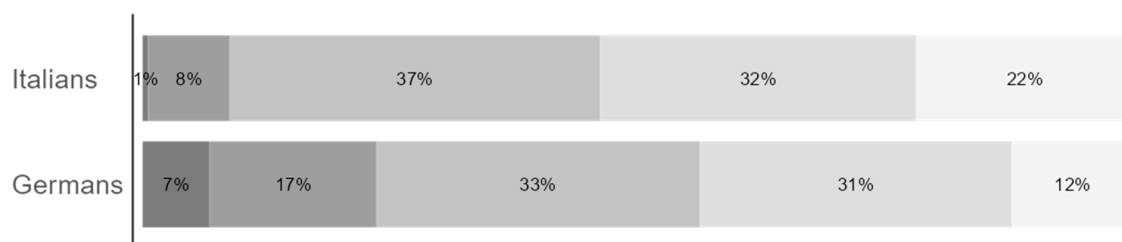

Frequency (%)

Strongly disagree Disagree Neither agree nor disagree Agree Strongly agree

## EMOTIONAL APPEAL

10\_EMA3

*Zoos have a good reputation*

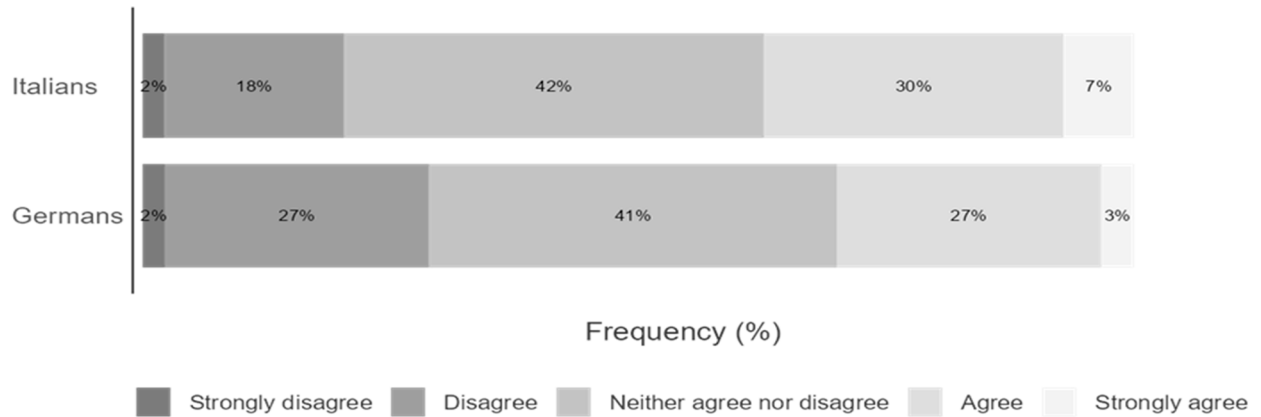

8\_EMA1

*I trust in zoos.*

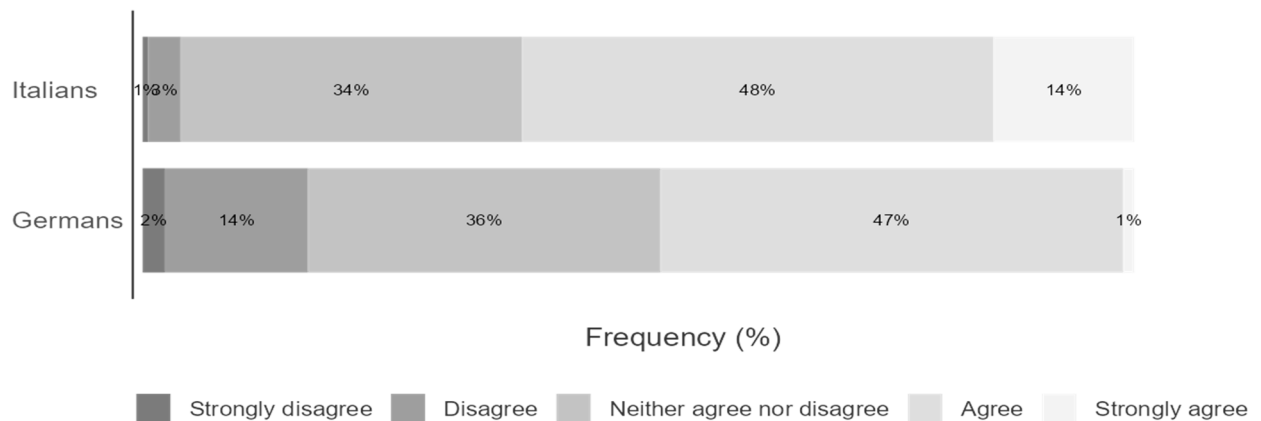

9\_EMA2R

*I have negative feelings towards zoos.*

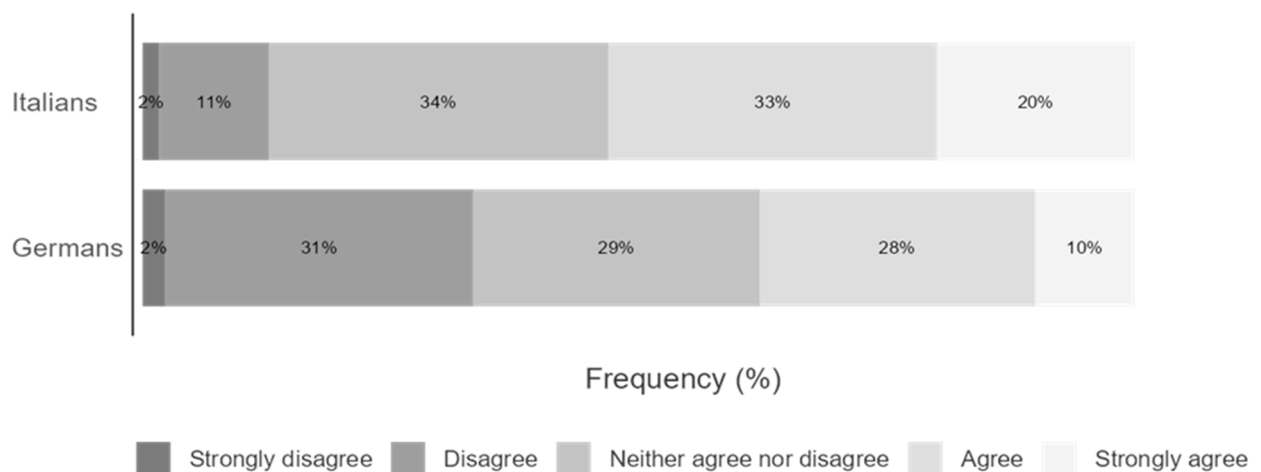

11\_EMA4

*I admire and respect zoos.*

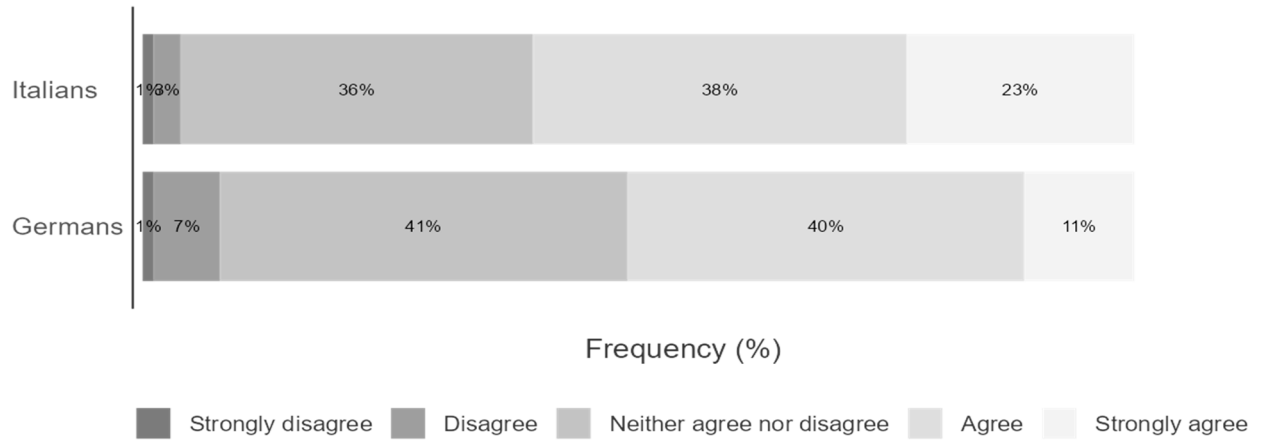

## KNOWLEDGE

22\_KNOW1

*Are animals in zoos taken from the wild?*

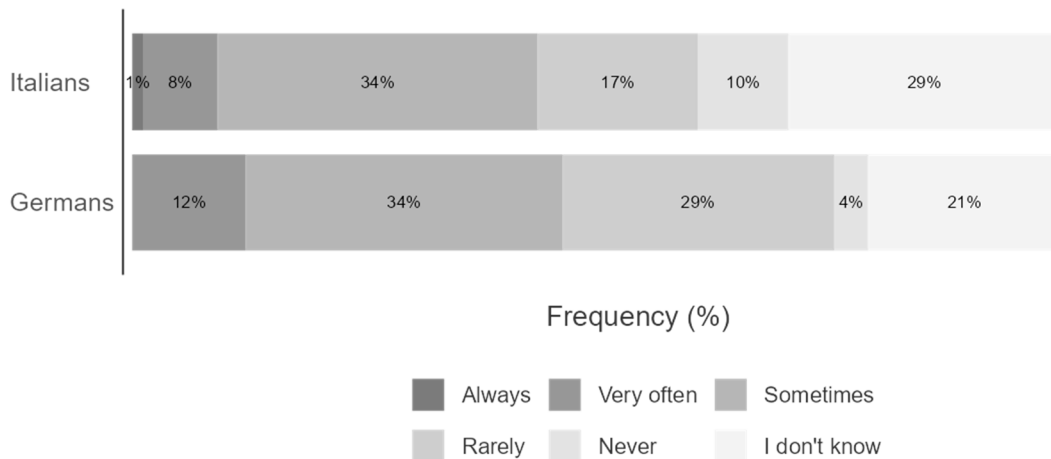

## Descriptives

[illegible]

Descriptives

|                 | Q2_0_NATION | Q2_1_FAM1 | Q2_2_FAM2 | Q2_3_FAM3 | Q2_4_FAM4 | Q2_5_FAM5 | Q2_6_FAM6 | Q2_8_EMA1 | Q2_9_EMA2R | Q2_10_EMA3 | Q2_11_EMA4 | 17_P_ERF1 | 18_P_ERF2 | 19_P_ERF3 | 21_P_ERF4 | 31_P_ERF5 | 20_P_R_SR1 | 27_P_R_SR2 |
|-----------------|-------------|-----------|-----------|-----------|-----------|-----------|-----------|-----------|------------|------------|------------|-----------|-----------|-----------|-----------|-----------|------------|------------|
| Maximum         | Germans     | 1         | 1         | 1         | 1         | 1         | 1         | 1         | 1          | 1          | 1          | 1         | 1         | 1         | 1         | 1         | 2          | 1          |
|                 | Italians    | 5         | 4         | 5         | 3         | 5         | 5         | 5         | 5          | 5          | 5          | 5         | 5         | 5         | 5         | 5         | 5          | 5          |
|                 | Germans     | 5         | 3         | 5         | 3         | 5         | 5         | 5         | 5          | 5          | 5          | 4         | 5         | 5         | 5         | 5         | 5          | 5          |
| 25th percentile | Italians    | 2.00      | 1.00      | 1.00      | 1.00      | 1.00      | 2.00      | 3.00      | 3.00       | 3.00       | 3.00       | 3.00      | 3.00      | 3.00      | 3.50      | 3.00      | 3.00       | 3.00       |
|                 | Germans     | 1.00      | 1.00      | 2.00      | 1.00      | 1.00      | 3.00      | 3.00      | 2.00       | 2.00       | 3.00       | 2.00      | 3.00      | 3.00      | 3.00      | 3.00      | 3.00       | 3.00       |
| 50th percentile | Italians    | 2.00      | 2.00      | 2.00      | 1.00      | 1.00      | 3.00      | 4.00      | 4.00       | 3.00       | 4.00       | 4.00      | 4.00      | 4.00      | 4.00      | 3.00      | 4.00       | 4.00       |
|                 | Germans     | 2.00      | 1.00      | 2.00      | 1.00      | 1.00      | 3.00      | 3.00      | 3.00       | 3.00       | 4.00       | 3.00      | 4.00      | 4.00      | 3.00      | 3.00      | 4.00       | 3.00       |
| 75th percentile | Italians    | 3.00      | 2.00      | 2.00      | 1.00      | 2.00      | 3.00      | 4.00      | 4.00       | 4.00       | 4.00       | 4.00      | 4.00      | 4.00      | 4.00      | 4.00      | 4.00       | 4.00       |
|                 | Germans     | 2.00      | 2.00      | 3.00      | 1.00      | 2.00      | 4.00      | 4.00      | 4.00       | 4.00       | 4.00       | 3.00      | 4.00      | 4.00      | 4.00      | 4.00      | 4.00       | 4.00       |

Q2\_1\_FAM1

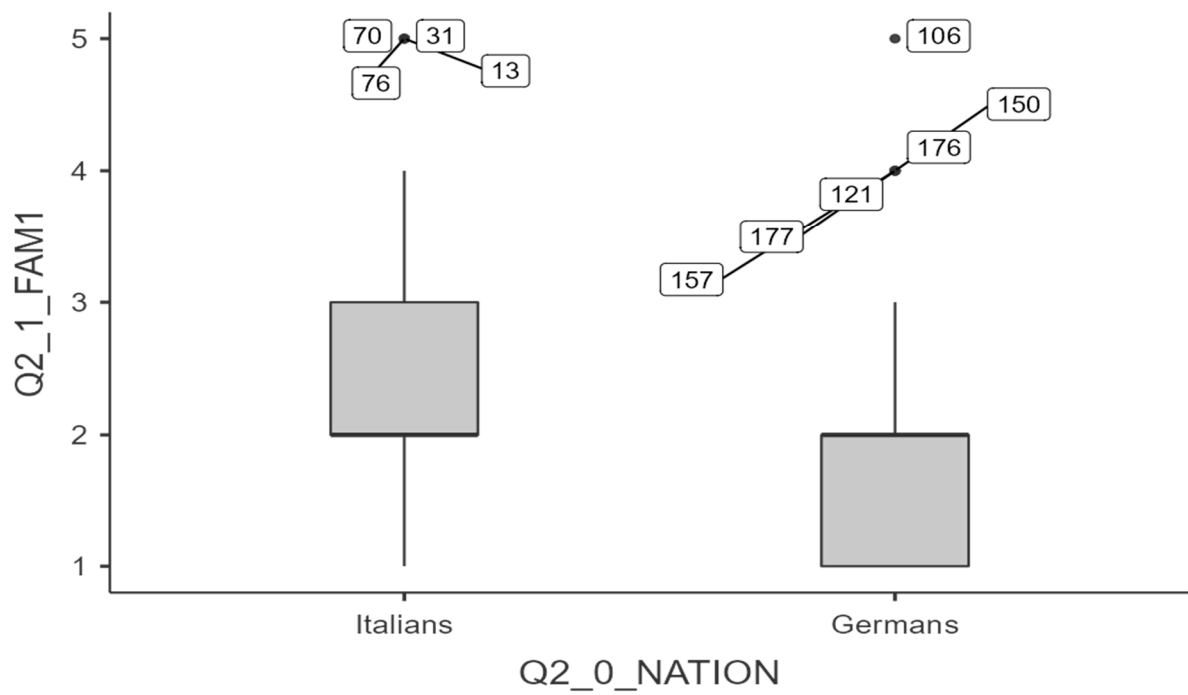

Q2\_2\_FAM2

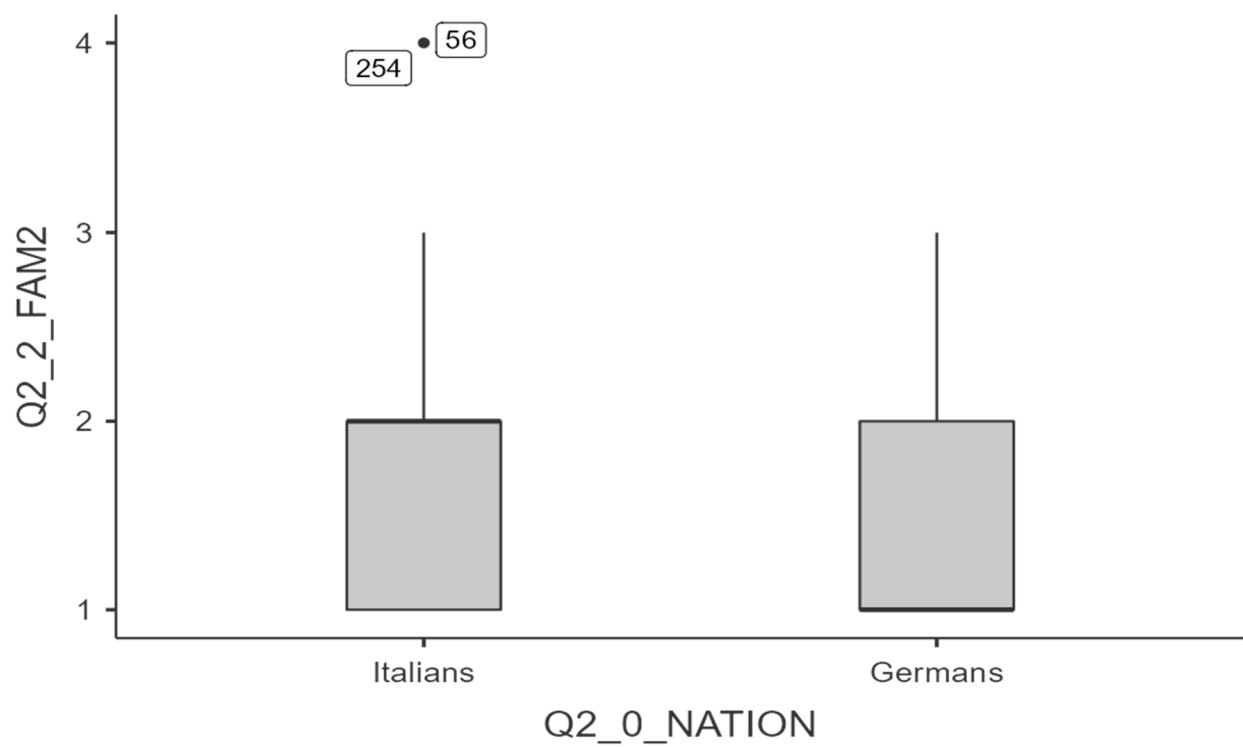

Q2\_3\_FAM3

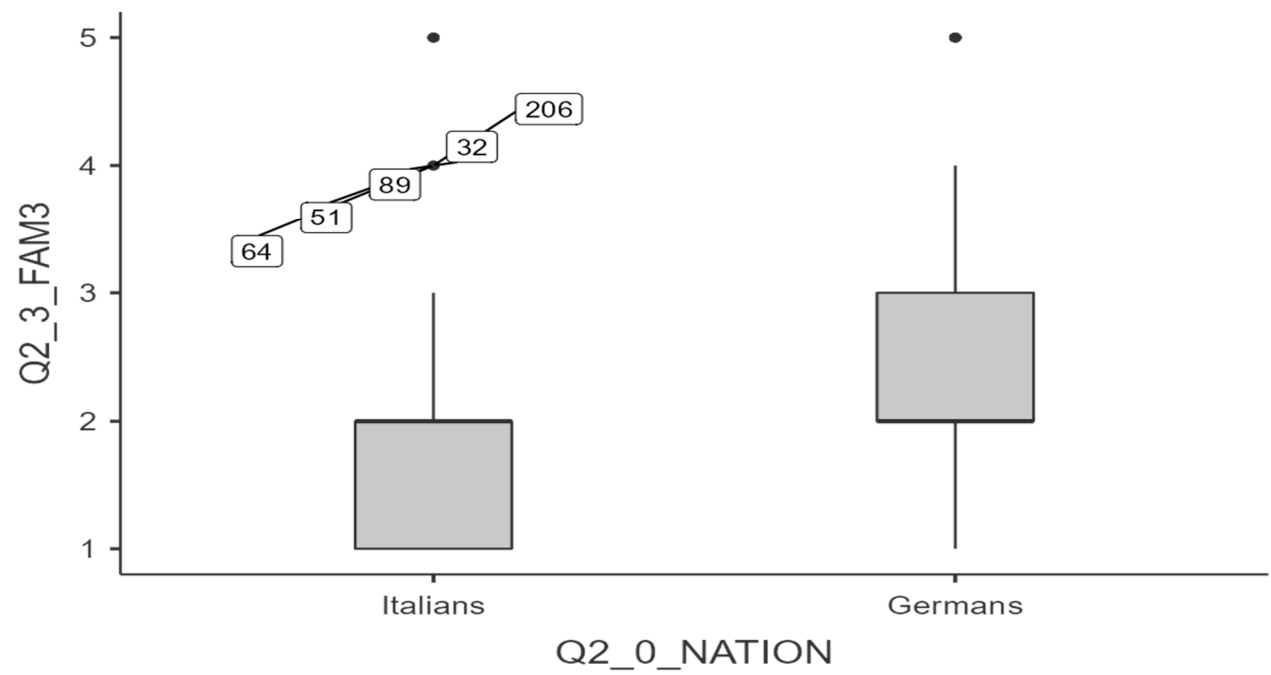

Q2\_4\_FAM4

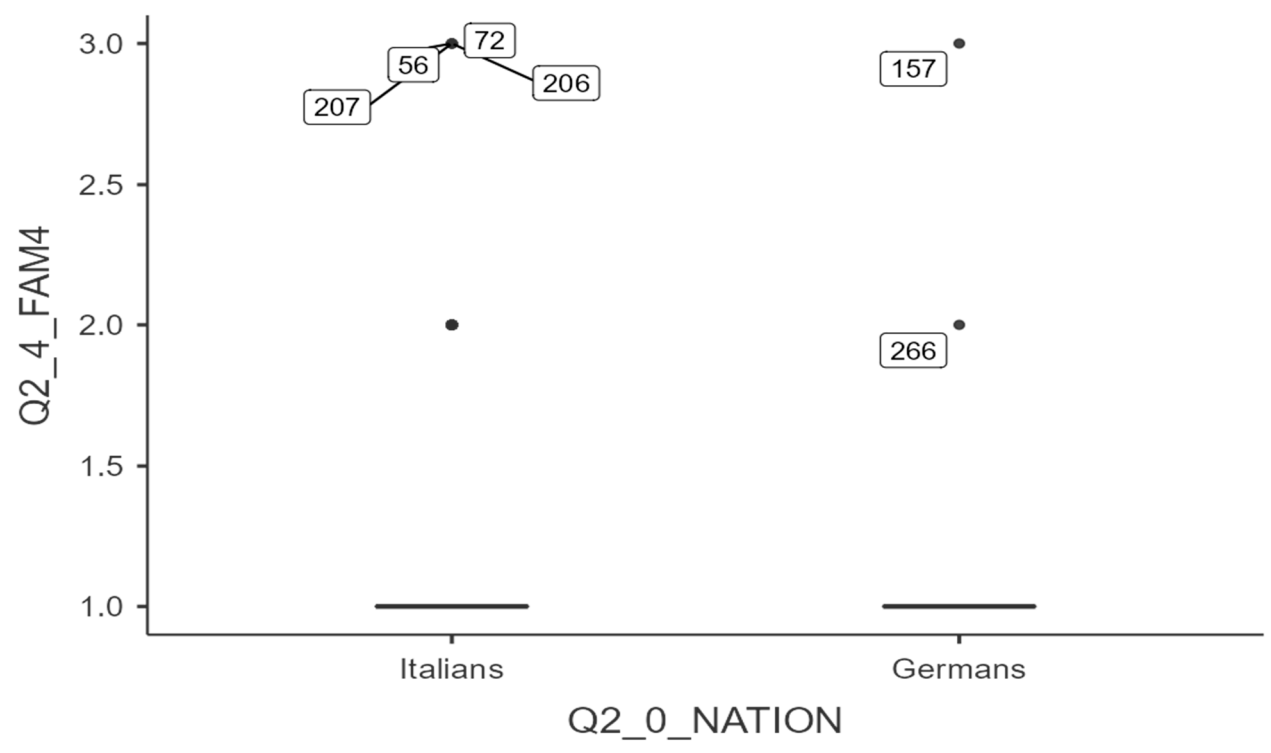

Q2\_5\_FAM5

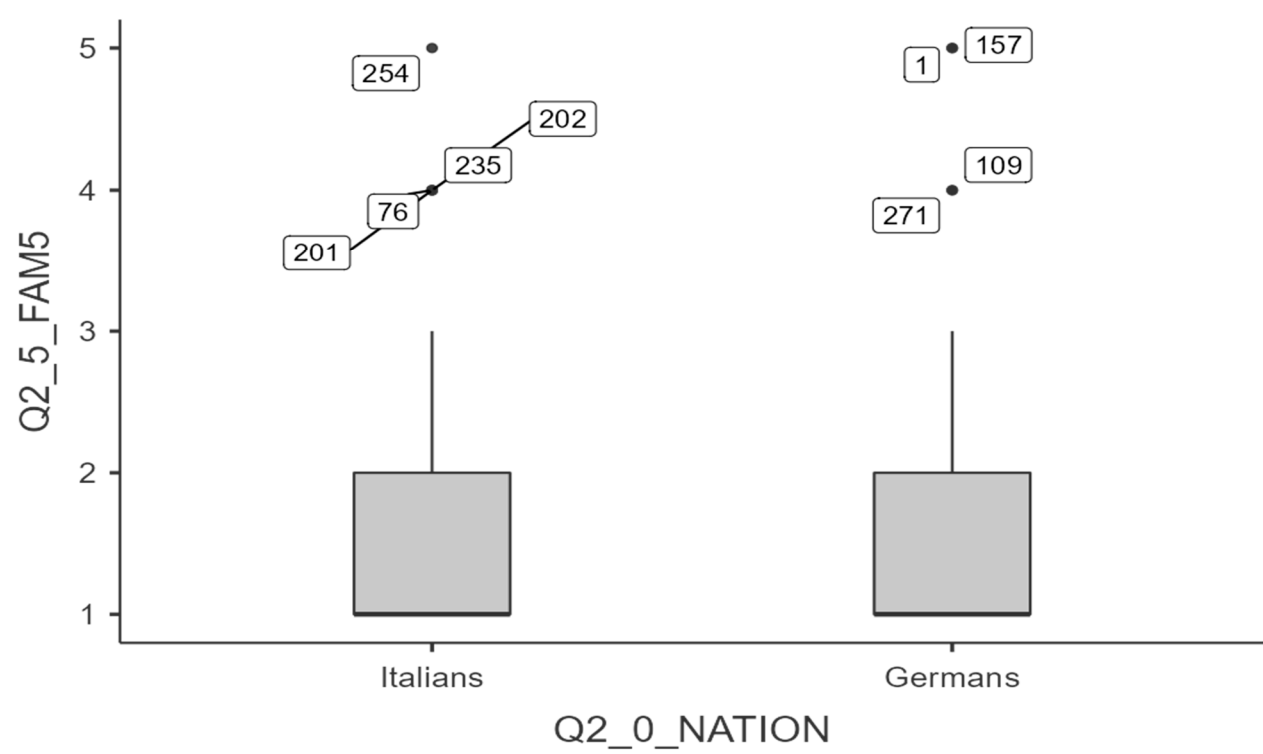

Q2\_6\_FAM6

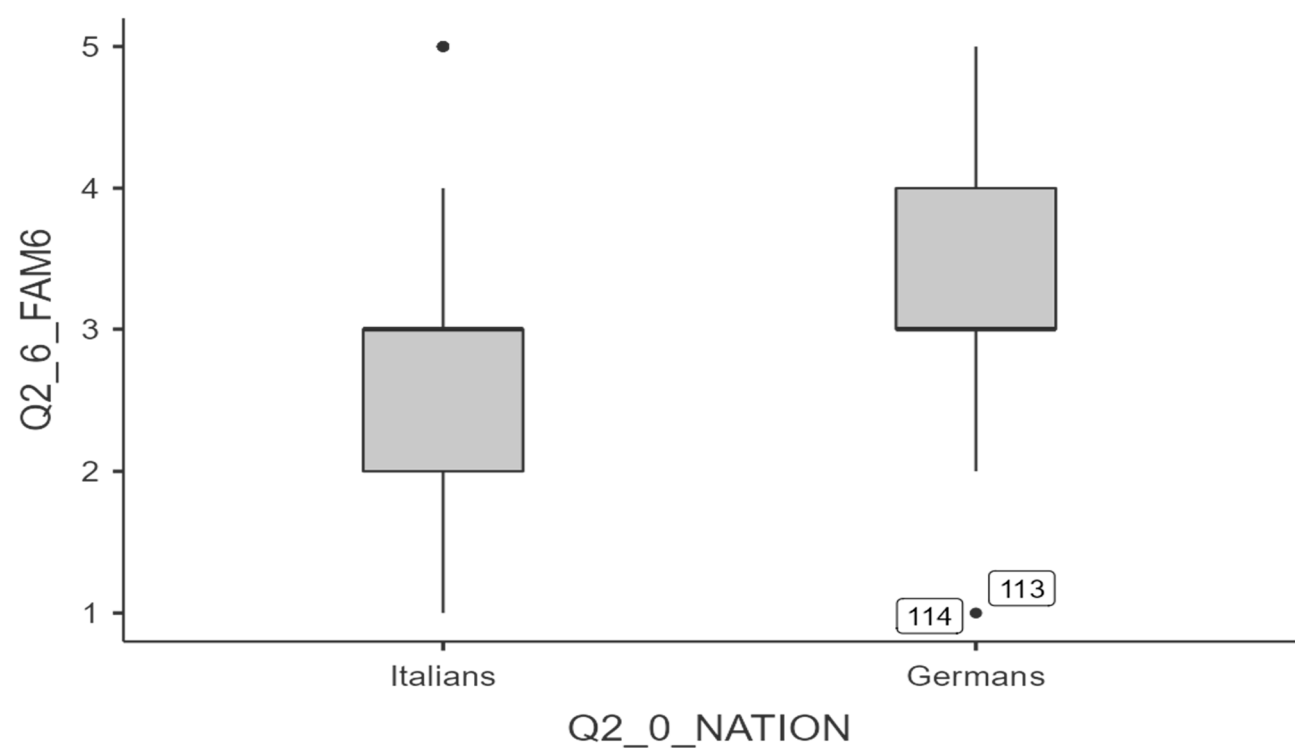

Q2\_8\_EMA1

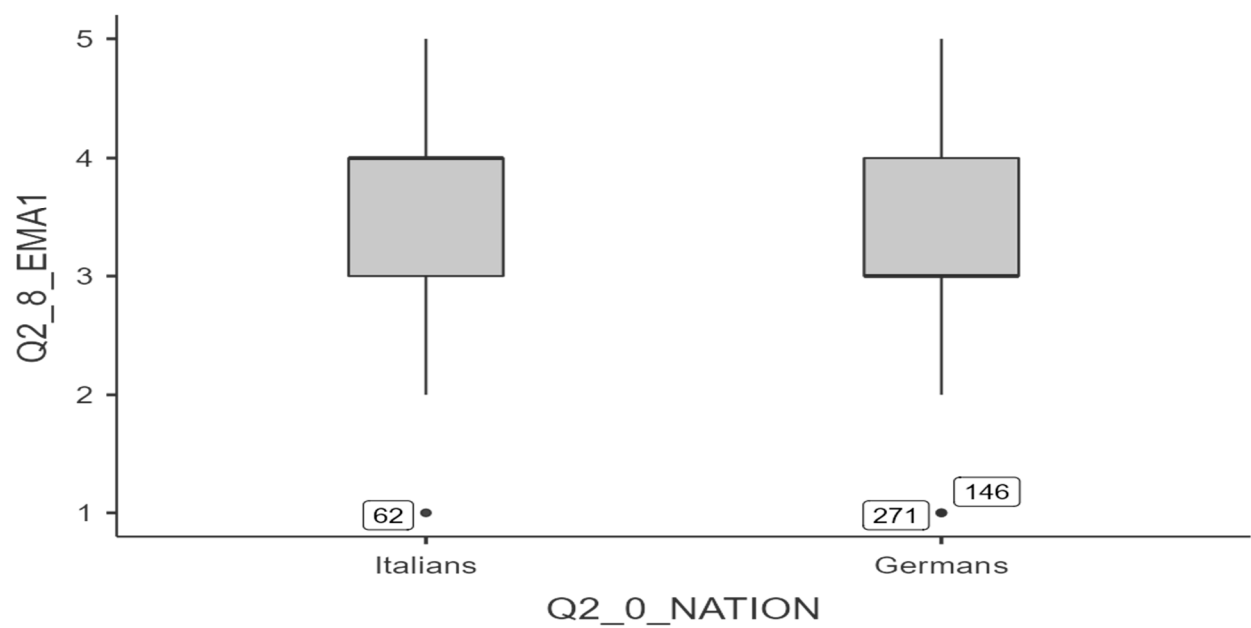

Q2\_9\_EMA2R

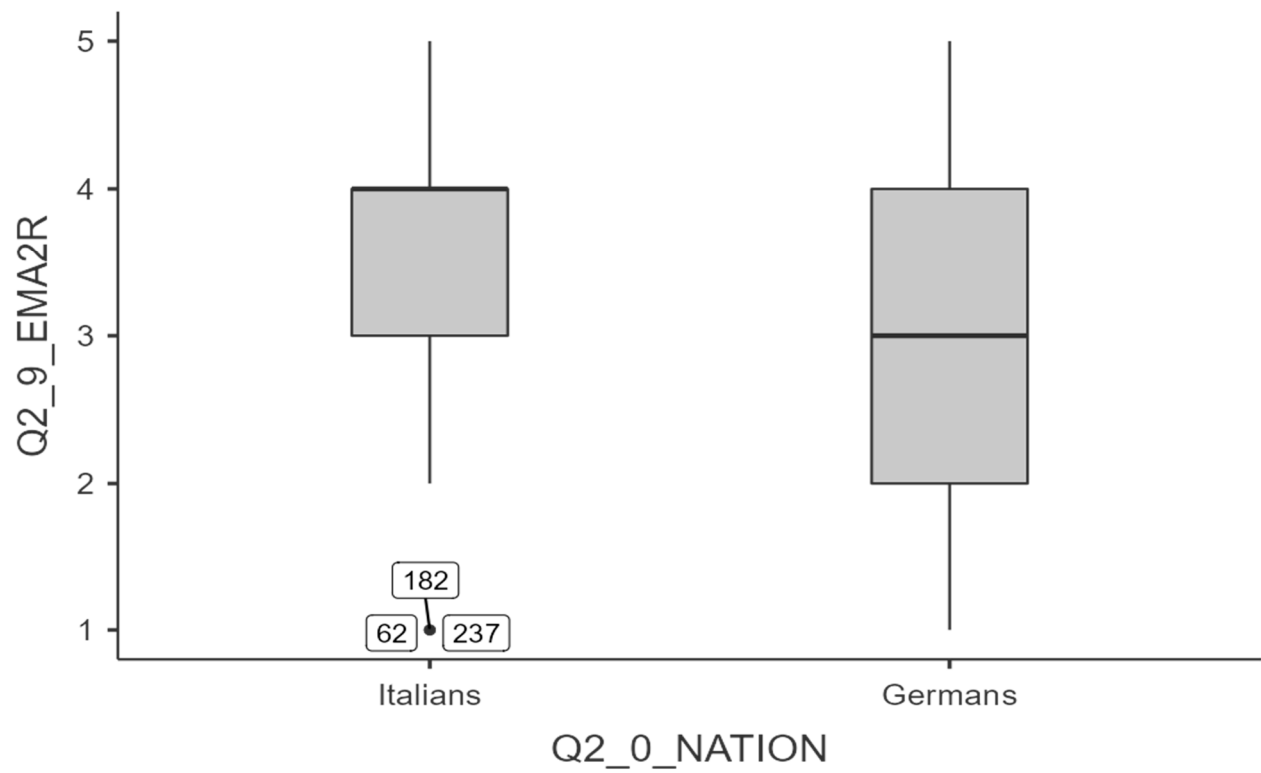

Q2\_10\_EMA3

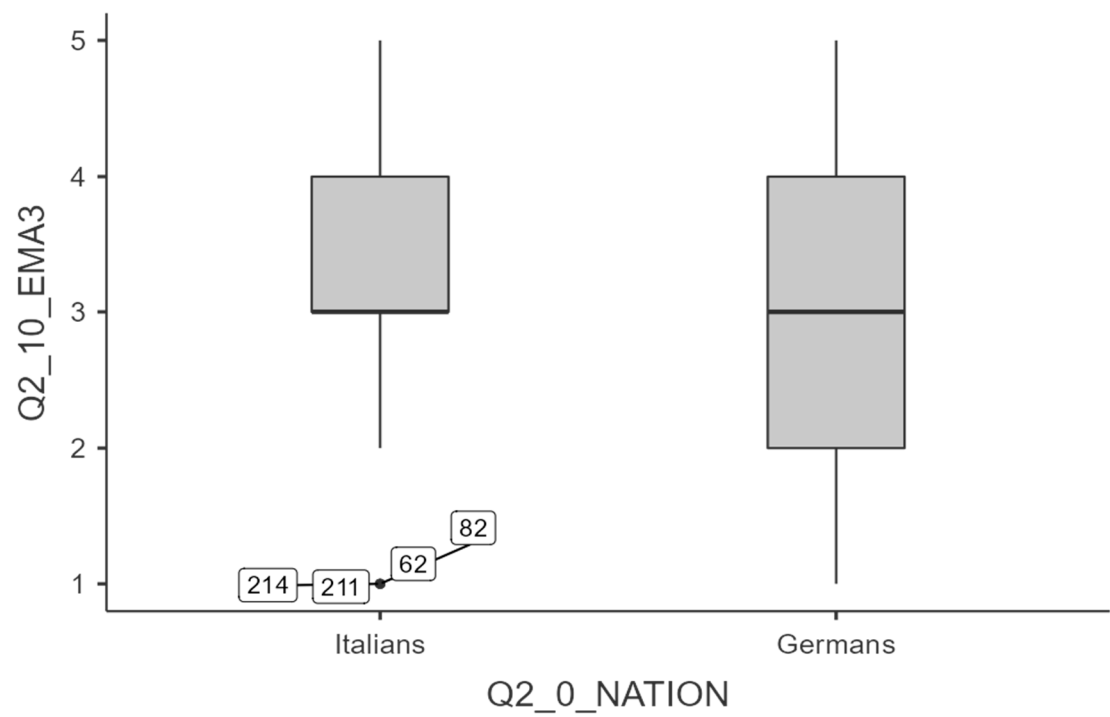

Q2\_11\_EMA4

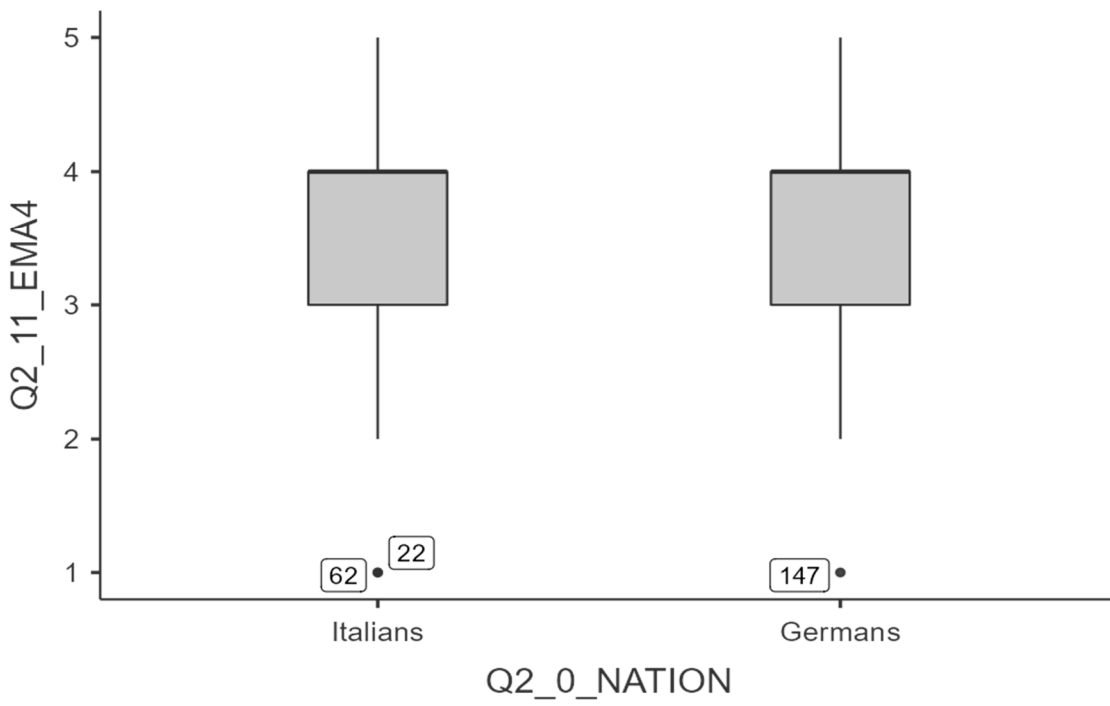

### 17\_PERF1

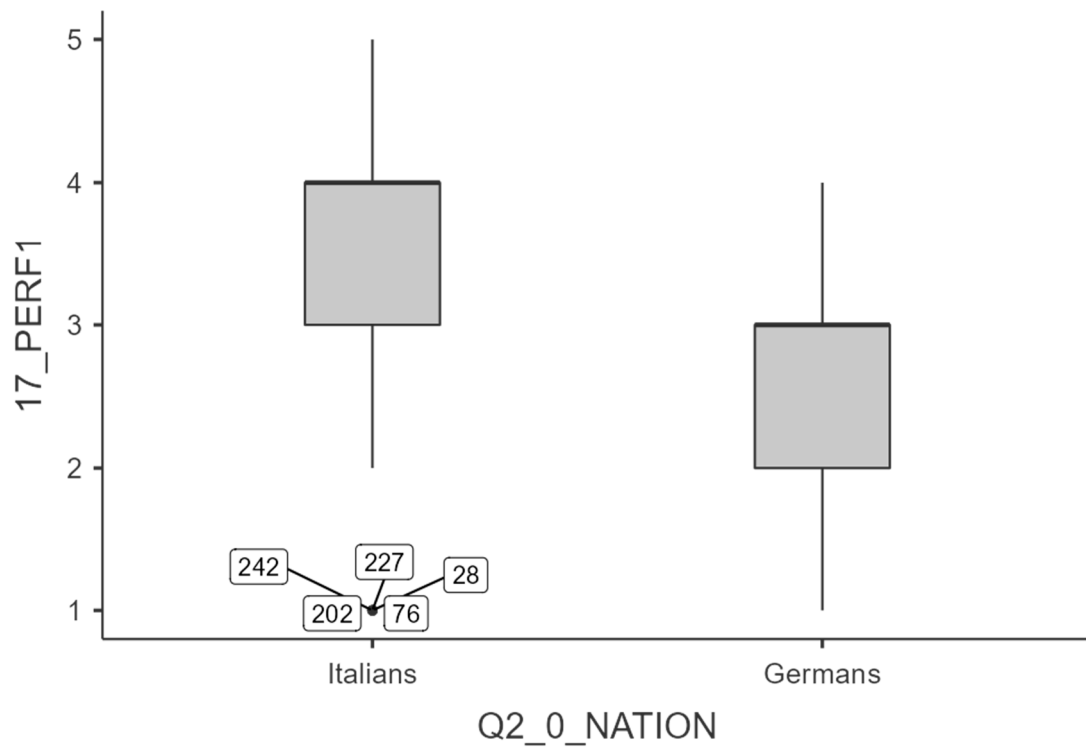

### 18\_PERF2

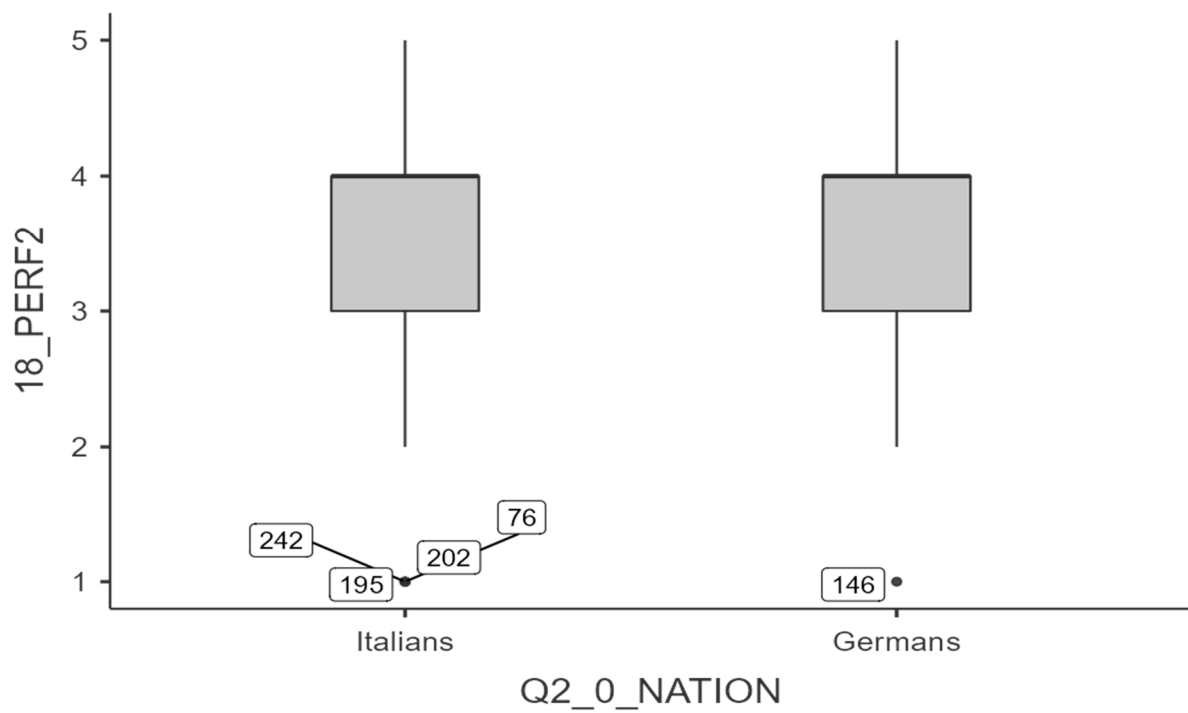

### 19\_PERF3

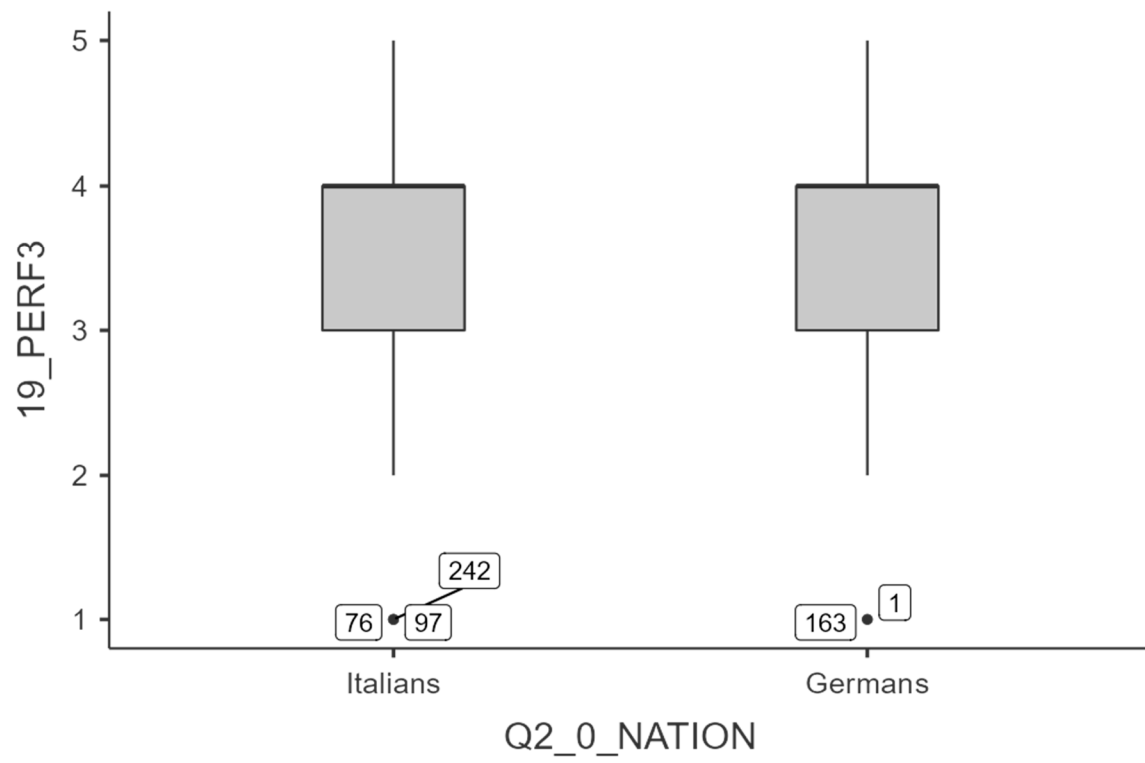

### 21\_PERF4

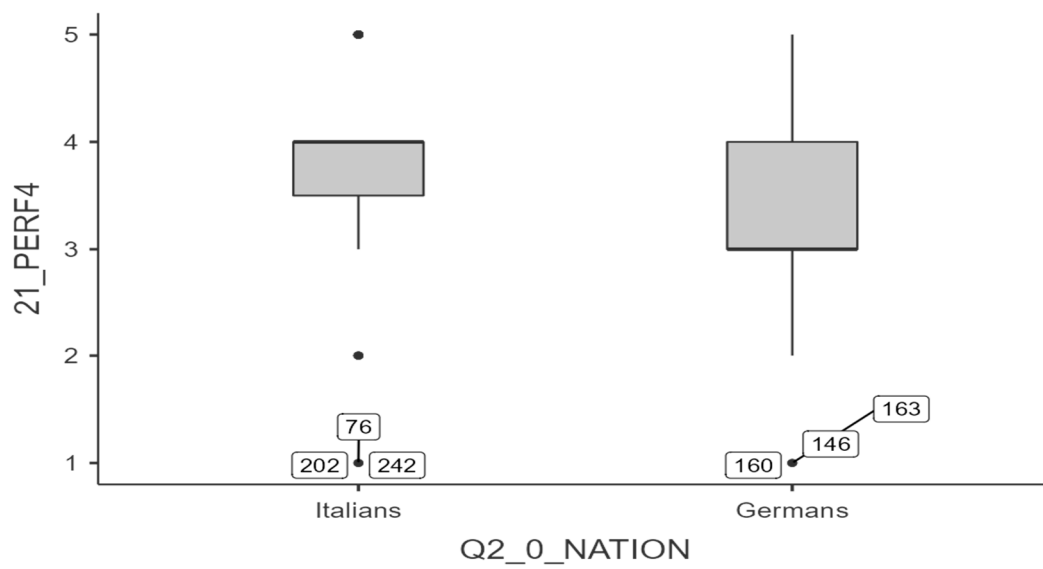

31\_PERF5

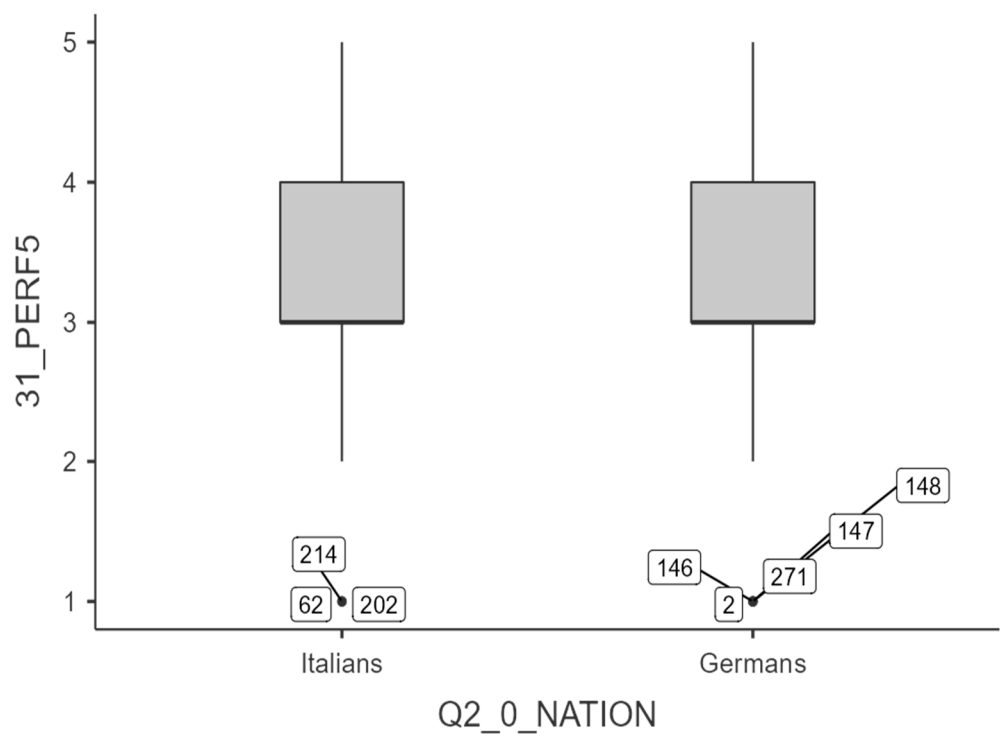

20\_PR\_SR1

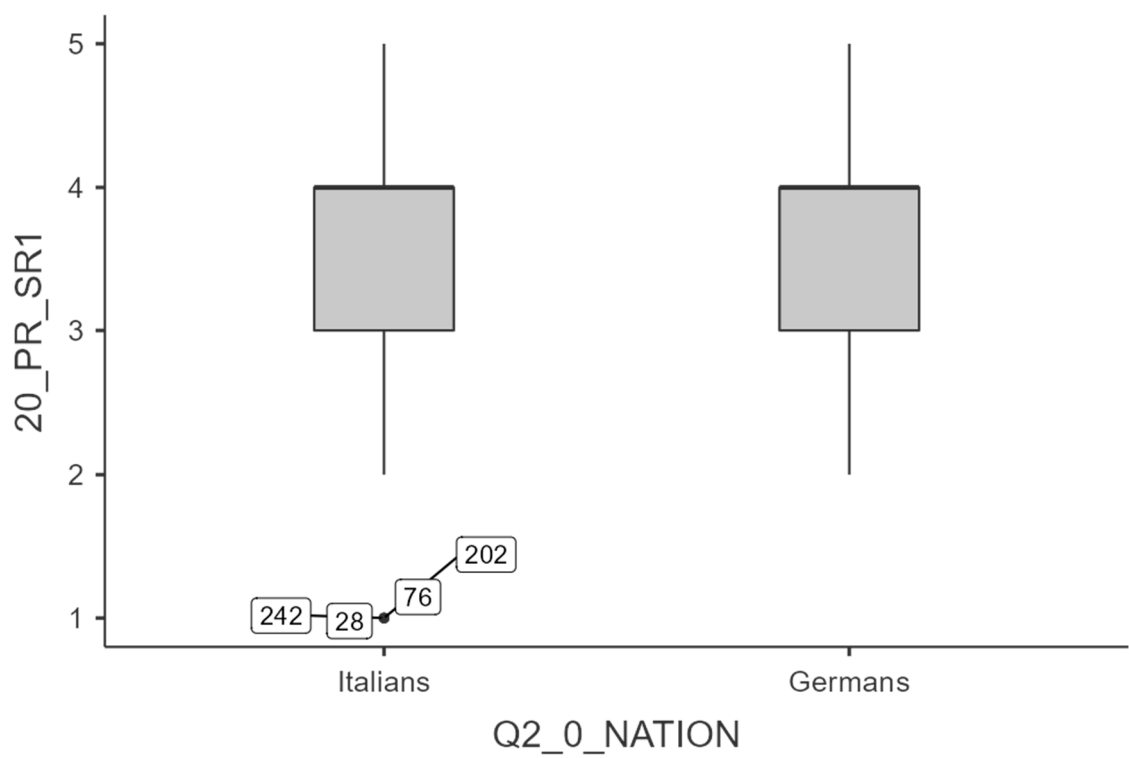

PR\_SR2

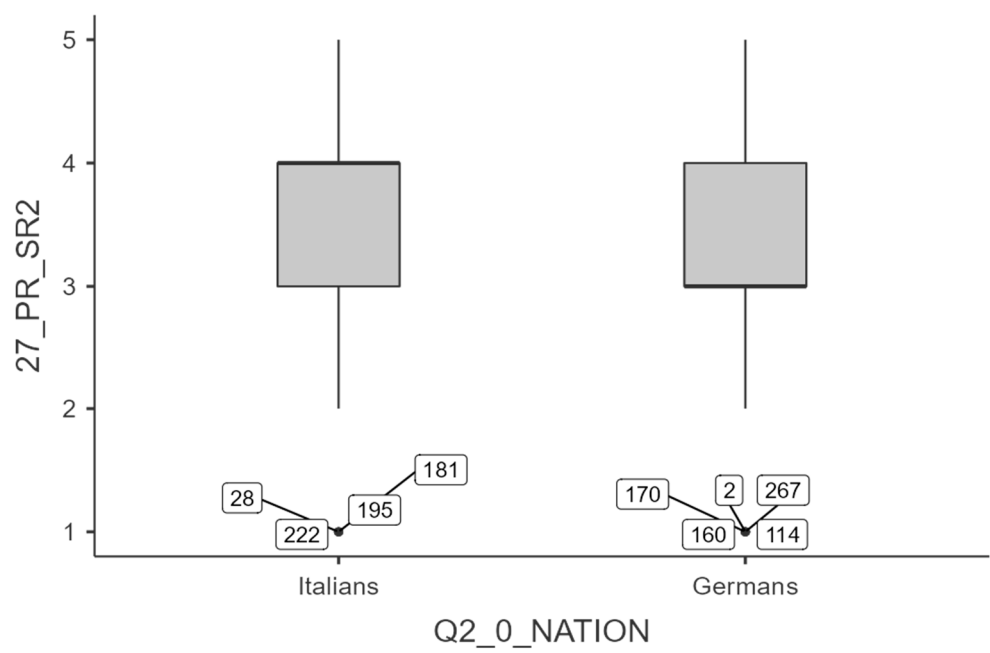

[illegible]

Descriptives

|                        | Q2_0_N<br>ATION | 24_WO<br>RKP1 | 25_WO<br>RKP2 | 26_WO<br>RKP3 | 28_SOC<br>RES1 | 29_SOC<br>RES2 | 30_SOC<br>RES3 | 34_VISI<br>ON1R | 35_VISI<br>ON2 | 36_VISI<br>ON3 | 23_E<br>TR1 | 33_E<br>TR2 | 37_E<br>TR3 | 38_E<br>TR4 | 39_ET<br>R5R | 32_E<br>TR6 |
|------------------------|-----------------|---------------|---------------|---------------|----------------|----------------|----------------|-----------------|----------------|----------------|-------------|-------------|-------------|-------------|--------------|-------------|
|                        | German<br>s     | 5             | 4             | 5             | 5              | 5              | 5              | 5               | 4              | 5              | 5           | 4           | 5           | 4           | 5            | 5           |
| 25th<br>perce<br>ntile | Italians        | 3.00          | 3.00          | 3.00          | 3.00           | 3.75           | 3.00           | 3.00            | 3.00           | 3.00           | 3.00        | 3.00        | 3.00        | 3.00        | 3.00         | 3.00        |
|                        | German<br>s     | 3.00          | 3.00          | 3.00          | 3.00           | 3.00           | 3.00           | 3.00            | 3.00           | 3.00           | 3.00        | 2.00        | 3.00        | 3.00        | 3.00         | 3.00        |
| 50th<br>perce<br>ntile | Italians        | 4.00          | 4.00          | 3.00          | 3.00           | 4.00           | 4.00           | 3.00            | 3.00           | 3.00           | 3.00        | 3.00        | 3.50        | 3.00        | 4.00         | 4.00        |
|                        | German<br>s     | 4.00          | 3.00          | 3.00          | 3.00           | 3.00           | 3.00           | 3.00            | 3.00           | 3.00           | 3.00        | 3.00        | 3.00        | 3.00        | 3.00         | 3.00        |
| 75th<br>perce<br>ntile | Italians        | 4.00          | 4.00          | 4.00          | 4.00           | 4.00           | 4.00           | 4.00            | 4.00           | 4.00           | 4.00        | 4.00        | 4.00        | 4.00        | 4.00         | 4.00        |
|                        | German<br>s     | 4.00          | 4.00          | 4.00          | 4.00           | 4.00           | 4.00           | 4.00            | 3.00           | 4.00           | 3.00        | 3.00        | 4.00        | 3.00        | 4.00         | 4.00        |

## Descriptives

|                    | Q2_0_NATION | 50_PWM1 | 51_PWM2 | 7_LOY1 | 52_LOY2 | 53_LOY3 |
|--------------------|-------------|---------|---------|--------|---------|---------|
| N                  | Italians    | 184     | 184     | 182    | 179     | 182     |
|                    | Germans     | 90      | 89      | 90     | 89      | 89      |
| Missing            | Italians    | 0       | 0       | 2      | 5       | 2       |
|                    | Germans     | 0       | 1       | 0      | 1       | 1       |
| Mean               | Italians    | 4.20    | 4.09    | 1.93   | 2.93    | 3.66    |
|                    | Germans     | 3.37    | 3.34    | 1.98   | 3.18    | 3.26    |
| Median             | Italians    | 4.00    | 4.00    | 2.00   | 3       | 4.00    |
|                    | Germans     | 3.00    | 3       | 2.00   | 3       | 3       |
| Standard deviation | Italians    | 0.908   | 0.883   | 0.249  | 1.19    | 0.930   |
|                    | Germans     | 1.28    | 1.13    | 0.148  | 0.984   | 1.09    |
| Minimum            | Italians    | 1       | 1       | 1      | 1       | 1       |
|                    | Germans     | 1       | 1       | 1      | 1       | 1       |
| Maximum            | Italians    | 5       | 5       | 2      | 5       | 5       |
|                    | Germans     | 5       | 5       | 2      | 5       | 5       |
| 25th percentile    | Italians    | 3.00    | 3.75    | 2.00   | 2.00    | 3.00    |
|                    | Germans     | 3.00    | 3.00    | 2.00   | 3.00    | 3.00    |
| 50th percentile    | Italians    | 4.00    | 4.00    | 2.00   | 3.00    | 4.00    |
|                    | Germans     | 3.00    | 3.00    | 2.00   | 3.00    | 3.00    |
| 75th percentile    | Italians    | 5.00    | 5.00    | 2.00   | 4.00    | 4.00    |
|                    | Germans     | 4.00    | 4.00    | 2.00   | 4.00    | 4.00    |

50\_PWM1

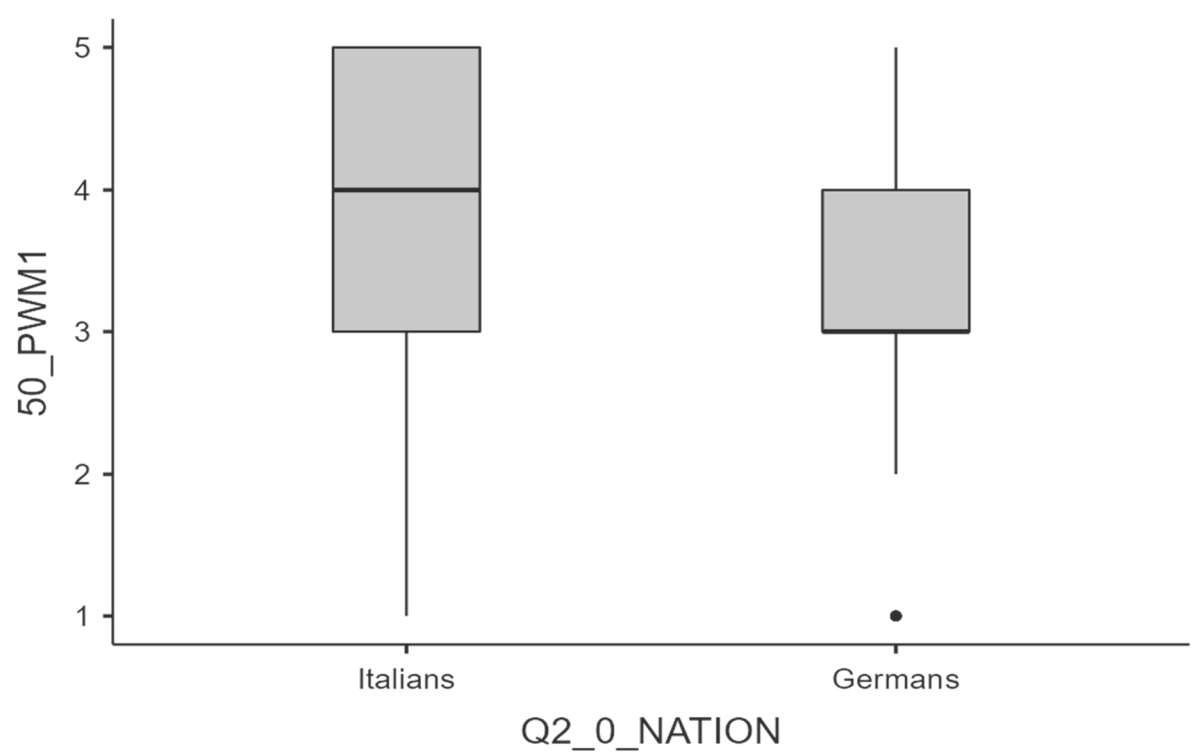

51\_PWM2

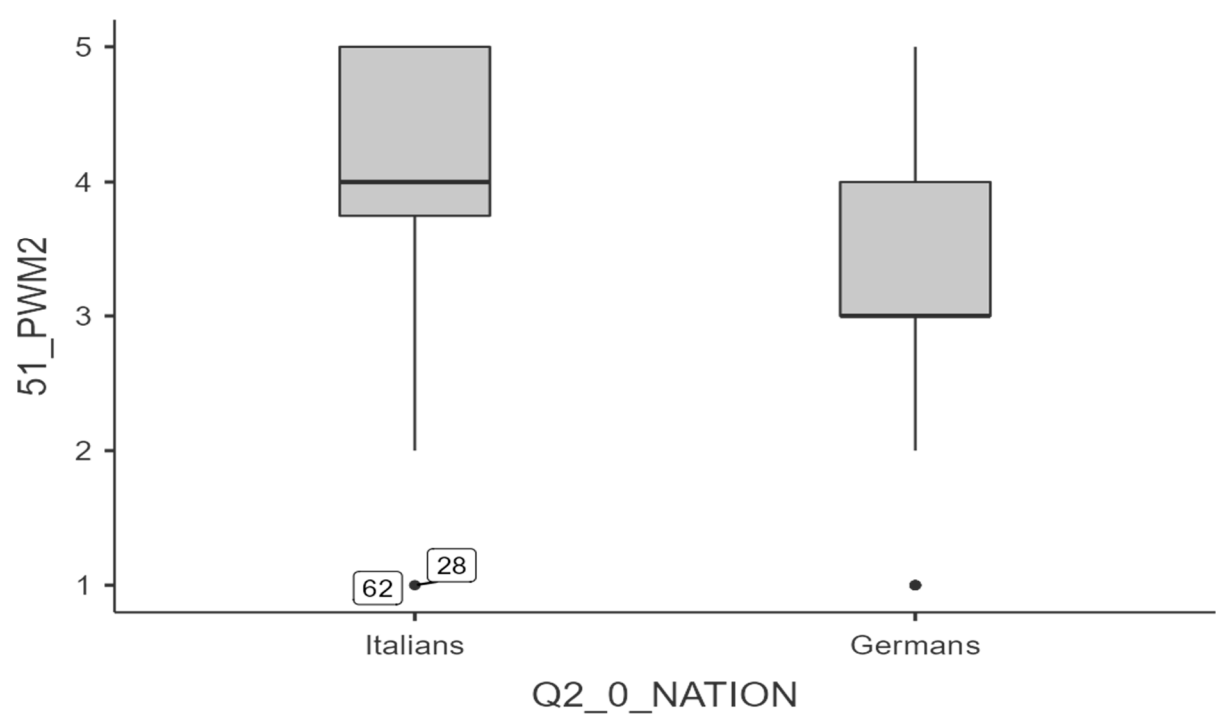

7\_LOY1

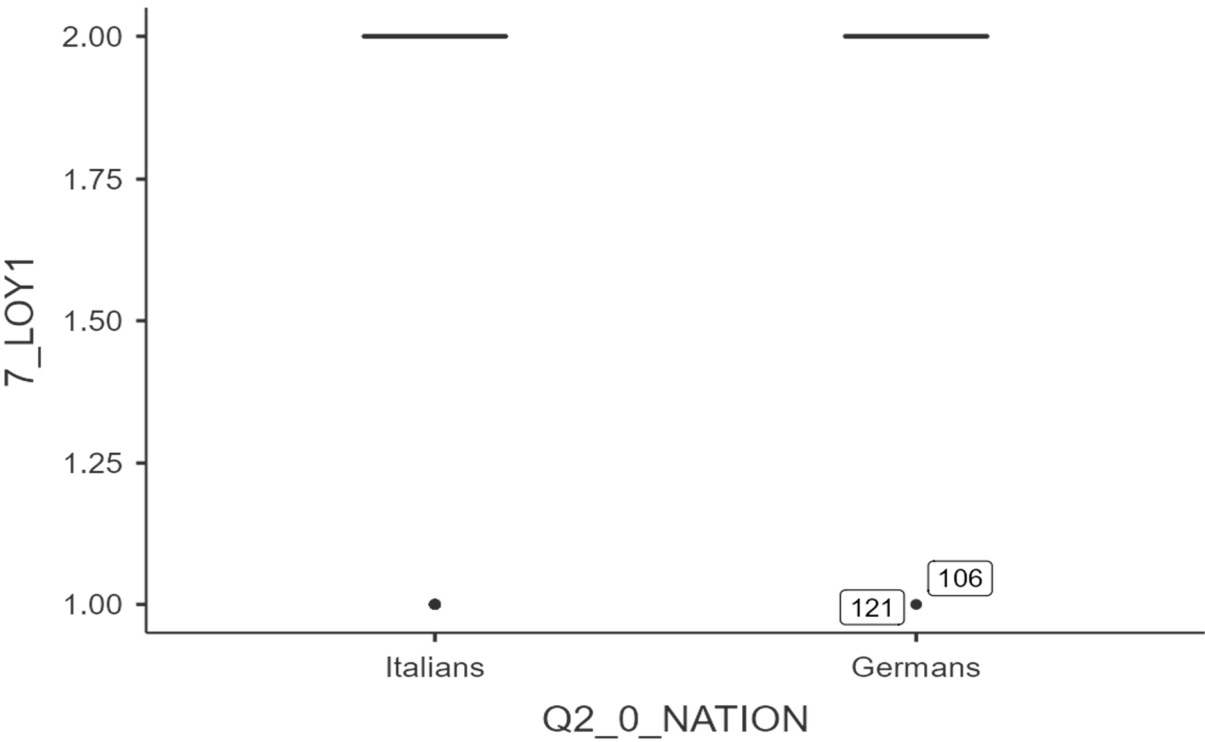

2\_LOY2

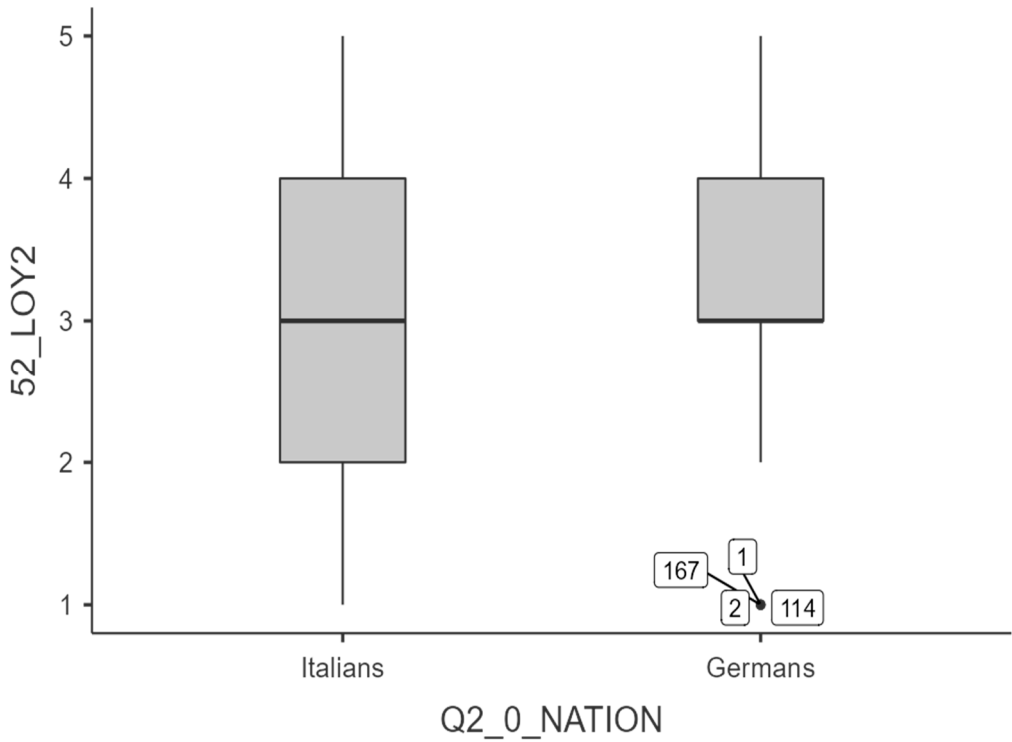

53\_LOY3

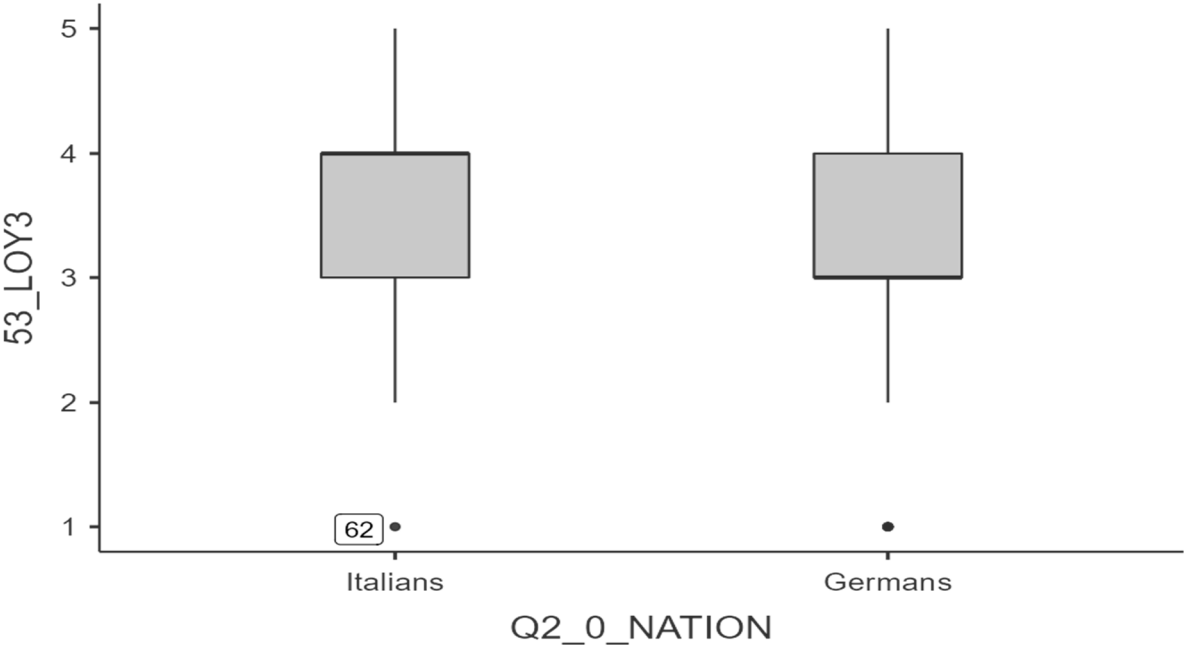

Supplement: s1 [file s1]
