# Supplementary material for: Development of A Tool for Assessing the Reputation of Zoos: The Zoo Ethical Reputation Survey (ZERS)
Source: MDPI journal article supplement (doi:10.3390/ani12202802), 2022-10-17
Supplement: s1 [file s1]

## Supplementary File S1

### THE ZERS QUESTIONNAIRE

How many times have you visited the following facilities in the last 12 months? Put a cross for each row.

|   |                                          | Never | Once | 2-3 times | 4-10 times | More than 10 times |
|---|------------------------------------------|-------|------|-----------|------------|--------------------|
| 1 | Zoos                                     |       |      |           |            |                    |
| 2 | Aquariums                                |       |      |           |            |                    |
| 3 | Natural Parks and reserves               |       |      |           |            |                    |
| 4 | Safari Parks                             |       |      |           |            |                    |
| 5 | Other facilities that house wild animals |       |      |           |            |                    |

6 Rate your degree of familiarity with zoos.

| None                  | Low                   | Average               | High                  | Very high             |
|-----------------------|-----------------------|-----------------------|-----------------------|-----------------------|
| <input type="radio"/> |

7 Do you have a season ticket or a membership pass for a zoo?

- ☐ Yes
- ☐ No

Please indicate your opinion about the following statements.

|    |                                                  | Strongly disagree | Disagree | Neither agree nor disagree | Agree | Strongly agree |
|----|--------------------------------------------------|-------------------|----------|----------------------------|-------|----------------|
| 8  | I trust zoos.                                    |                   |          |                            |       |                |
| 9  | I have negative feelings towards zoos.           |                   |          |                            |       |                |
| 10 | Zoos have a good reputation.                     |                   |          |                            |       |                |
| 11 | I admire and respect zoos.                       |                   |          |                            |       |                |
| 12 | Zoos enable a direct experience of wild animals. |                   |          |                            |       |                |

How frequently do you feel each of these emotions when thinking about animal extinctions? Put a cross for each row.

|    |             | Always | Very Often | Sometimes | Rarely | Never |
|----|-------------|--------|------------|-----------|--------|-------|
| 13 | Worried     |        |            |           |        |       |
| 14 | Alarmed     |        |            |           |        |       |
| 15 | Unconcerned |        |            |           |        |       |
| 16 | Hopeful     |        |            |           |        |       |

Please indicate your opinion about the following statements

|    |                                                                           | Strongly disagree | Disagree | Neither agree nor disagree | Agree | Strongly agree |
|----|---------------------------------------------------------------------------|-------------------|----------|----------------------------|-------|----------------|
| 17 | Zoos are committed to guaranteeing high standards of animal welfare.      |                   |          |                            |       |                |
| 18 | Zoos educate their visitors about wildlife conservation.                  |                   |          |                            |       |                |
| 19 | Zoos do scientific research.                                              |                   |          |                            |       |                |
| 20 | The time spent in zoos is a good value for the money spent on the ticket. |                   |          |                            |       |                |
| 21 | Zoos dedicate themselves to conservation projects in the wild.            |                   |          |                            |       |                |

22 Are animals in zoos taken from the wild?

- ☐ Always
- ☐ Very often
- ☐ Sometimes
- ☐ Rarely
- ☐ Never
- ☐ I don't know

Please indicate your opinion about the following statements

|    |                                                                                  | <b>Strongly<br/>disagree</b> | <b>Disagree</b> | <b>Neither<br/>agree<br/>nor<br/>disagree</b> | <b>Agree</b> | <b>Strongly<br/>agree</b> |
|----|----------------------------------------------------------------------------------|------------------------------|-----------------|-----------------------------------------------|--------------|---------------------------|
| 23 | Zoos act in a transparent and ethical way.                                       |                              |                 |                                               |              |                           |
| 24 | Zoos' staff is passionate about their job.                                       |                              |                 |                                               |              |                           |
| 25 | Zoos are well managed.                                                           |                              |                 |                                               |              |                           |
| 26 | Zoos are good companies to work for.                                             |                              |                 |                                               |              |                           |
| 27 | Zoos' staff help me in having a nice day at the zoo.                             |                              |                 |                                               |              |                           |
| 28 | Zoos promote projects with local communities.                                    |                              |                 |                                               |              |                           |
| 29 | Zoos are environmentally responsible organizations.                              |                              |                 |                                               |              |                           |
| 30 | Zoos support good causes.                                                        |                              |                 |                                               |              |                           |
| 31 | Zoos are going to become a bigger reality in the future.                         |                              |                 |                                               |              |                           |
| 32 | Zoos handle their animals in a responsible way.                                  |                              |                 |                                               |              |                           |
| 33 | Zoos are open and transparent about the way they operate.                        |                              |                 |                                               |              |                           |
| 34 | Zoos make unclear and undefined promises.                                        |                              |                 |                                               |              |                           |
| 35 | Zoos have excellent management.                                                  |                              |                 |                                               |              |                           |
| 36 | Zoos explain clearly their goals and their mission.                              |                              |                 |                                               |              |                           |
| 37 | Zoos are accurate when disseminating information.                                |                              |                 |                                               |              |                           |
| 38 | Zoos do what they say they are going to do.                                      |                              |                 |                                               |              |                           |
| 39 | Zoos are dishonest and false in their communications.                            |                              |                 |                                               |              |                           |
| 40 | It is meaningful that zoos make society aware of the importance of conservation. |                              |                 |                                               |              |                           |
| 41 | It is meaningful that zoos conserve and protect threatened animals.              |                              |                 |                                               |              |                           |
| 42 | It is meaningful that zoos breed endangered animals.                             |                              |                 |                                               |              |                           |
| 43 | It is plausible that zoos use their animals as a learning resource.              |                              |                 |                                               |              |                           |
| 44 | It is meaningful that zoos perform educational programmes for children.          |                              |                 |                                               |              |                           |

|    |                                                                          |  |  |  |  |  |
|----|--------------------------------------------------------------------------|--|--|--|--|--|
| 45 | It is plausible that zoos entertain visitors through various programmes. |  |  |  |  |  |
| 46 | It is meaningful that zoos are a place for scientific research.          |  |  |  |  |  |
| 47 | It is meaningful that zoos educate about conservation issues.            |  |  |  |  |  |
| 48 | It is meaningful that zoos are a place for recreation.                   |  |  |  |  |  |

On a scale of 0 to 5, with 5 being the highest, what's the likelihood that you would do the following actions? (0 is "absolutely not" and 5 is "absolutely yes")

|    |                                                                             | 0 | 1 | 2 | 3 | 4 | 5 |
|----|-----------------------------------------------------------------------------|---|---|---|---|---|---|
| 49 | I will visit zoos in the future.                                            |   |   |   |   |   |   |
| 50 | I will suggest to a friend to go to zoos.                                   |   |   |   |   |   |   |
| 51 | I will say positive things about zoos.                                      |   |   |   |   |   |   |
| 52 | I will leave feedback about how the zoo can be improved.                    |   |   |   |   |   |   |
| 53 | If a zoo has to face a problem, I will trust it will make the right choice. |   |   |   |   |   |   |

Only for statistical purposes, please fill the form with your personal information. The questionnaire is anonymous.

|                                                                                                                                                                                                                                                                                                                                                                                                                                                                                                                                                                                                                                                                                                                         |                                                                                                                                                                                                                                                                                                                                                                                                                                                                                                                                                                                                                              |
|-------------------------------------------------------------------------------------------------------------------------------------------------------------------------------------------------------------------------------------------------------------------------------------------------------------------------------------------------------------------------------------------------------------------------------------------------------------------------------------------------------------------------------------------------------------------------------------------------------------------------------------------------------------------------------------------------------------------------|------------------------------------------------------------------------------------------------------------------------------------------------------------------------------------------------------------------------------------------------------------------------------------------------------------------------------------------------------------------------------------------------------------------------------------------------------------------------------------------------------------------------------------------------------------------------------------------------------------------------------|
| <p><b>54 What is your age?</b></p> <p> <input type="radio"/> 14 – 18 years<br/> <input type="radio"/> 19 – 25 years<br/> <input type="radio"/> 26 - 34 years<br/> <input type="radio"/> 35 - 54 years<br/> <input type="radio"/> 55 to 64 years<br/> <input type="radio"/> over 64         </p> <p><b>55 Gender</b></p> <p> <input type="radio"/> Male<br/> <input type="radio"/> Female<br/> <input type="radio"/> I prefer not to answer         </p> <p><b>56 Do you currently have pets at home?</b></p> <p> <input type="radio"/> Yes<br/> <input type="radio"/> No         </p> <p><b>57 Do you practice sports or activities connected to the natural world? (Trekking, mountain climbing, diving, etc.)</b></p> | <p><b>59 Do you have specific training on animals or nature?</b></p> <p> <input type="radio"/> Yes<br/> <input type="radio"/> No         </p> <p><b>60 Where do you live?</b></p> <p> <input type="radio"/> Very rural/wilderness<br/> <input type="radio"/> Village or rural<br/> <input type="radio"/> Small town (under 10 000 habitants)<br/> <input type="radio"/> Medium/big-sized town         </p> <p><b>61 Have you ever travelled only or mainly to see animals?</b></p> <p> <input type="radio"/> Yes<br/> <input type="radio"/> No         </p> <p><b>62 Which of these describes your income last year?</b></p> |
|-------------------------------------------------------------------------------------------------------------------------------------------------------------------------------------------------------------------------------------------------------------------------------------------------------------------------------------------------------------------------------------------------------------------------------------------------------------------------------------------------------------------------------------------------------------------------------------------------------------------------------------------------------------------------------------------------------------------------|------------------------------------------------------------------------------------------------------------------------------------------------------------------------------------------------------------------------------------------------------------------------------------------------------------------------------------------------------------------------------------------------------------------------------------------------------------------------------------------------------------------------------------------------------------------------------------------------------------------------------|

|                                                                                                                                                                                                                                                                                                                                                                                                                                                                                                           |                                                                                                                                                                                                                                                                                          |
|-----------------------------------------------------------------------------------------------------------------------------------------------------------------------------------------------------------------------------------------------------------------------------------------------------------------------------------------------------------------------------------------------------------------------------------------------------------------------------------------------------------|------------------------------------------------------------------------------------------------------------------------------------------------------------------------------------------------------------------------------------------------------------------------------------------|
| <ul style="list-style-type: none"><li><input type="radio"/> Yes</li><li><input type="radio"/> No</li></ul> <p><b>58 Highest level of education completed</b></p> <ul style="list-style-type: none"><li><input type="radio"/> No schooling completed</li><li><input type="radio"/> Elementary school</li><li><input type="radio"/> Middle school</li><li><input type="radio"/> High school</li><li><input type="radio"/> University degree</li><li><input type="radio"/> Postgraduate degree/PhD</li></ul> | <ul style="list-style-type: none"><li><input type="radio"/> Less than 14000 €</li><li><input type="radio"/> 14000 - 29999 €</li><li><input type="radio"/> 30000 - 43000 €</li><li><input type="radio"/> More than 43000 €</li><li><input type="radio"/> I prefer not to answer</li></ul> |
|-----------------------------------------------------------------------------------------------------------------------------------------------------------------------------------------------------------------------------------------------------------------------------------------------------------------------------------------------------------------------------------------------------------------------------------------------------------------------------------------------------------|------------------------------------------------------------------------------------------------------------------------------------------------------------------------------------------------------------------------------------------------------------------------------------------|
